# Supplementary material for: Efficacy of interactive video gaming in older adults with memory complaints: A cluster-randomized exercise intervention
Source: PubMed Central journal article supplement (PMC8148311; doi:10.1371/journal.pone.0252016), 2021-05-25
Supplement: pone.0252016.s001.pdf [file pone.0252016.s001.pdf]

| CODE      | GROUP | CLUSTER | AGE | Heighta | Heightb | Weighta | Weightb | B.M.Ia |          |
|-----------|-------|---------|-----|---------|---------|---------|---------|--------|----------|
| INT0001   | 1     | 1       | 1   | 76      | 1,64    | 1,64    | 69,6    | 67,8   | 25,87745 |
| INT0002   | 1     | 1       | 1   | 77      | 1,58    | 1,57    | 88,3    | 89,4   | 35,37093 |
| INT0003   | 1     | 1       | 1   | 74      | 1,5     | 1,51    | 57,8    | 56,8   | 25,68889 |
| INT0004   | 1     | 1       | 1   | 71      | 1,54    | 1,53    | 65,2    | 62,5   | 27,49199 |
| INT0005   | 1     | 1       | 1   | 66      | 1,62    | 1,62    | 83,6    | 83,9   | 31,8549  |
| INT0007   | 1     | 1       | 1   | 71      | 1,62    | 1,62    | 100,1   | 101,4  | 38,14205 |
| INT0008   | 1     | 2       | 1   | 73      | 1,6     | 1,61    | 85,3    | 85,9   | 33,32031 |
| INT0009   | 1     | 1       | 1   | 67      | 1,56    | 1,56    | 59,8    | 60,6   | 24,57265 |
| INT00010  | 1     | 2       | 1   | 81      | 1,51    | 1,51    | 53,9    | 52,3   | 23,63931 |
| INT00011  | 1     | 2       | 1   | 76      | 1,65    | 1,7     | 89      | 86,8   | 32,69054 |
| INT00012  | 1     | 2       | 1   | 66      | 1,64    | 1,63    | 72,2    | 74,3   | 26,84414 |
| INT00013  | 1     | 1       | 1   | 68      | 1,62    | 1,62    | 73,5    | 71,5   | 28,0064  |
| INT00014  | 1     | 1       | 1   | 65      | 1,6     | 1,59    | 65,4    | 65,4   | 25,54688 |
| INT00015  | 1     | 1       | 1   | 66      | 1,59    | 1,58    | 60,8    | 59,7   | 24,04968 |
| INT00016  | 1     | 1       | 1   | 76      | 1,55    | 1,56    | 65,3    | 68,1   | 27,18002 |
| INT00017  | 1     | 3       | 1   | 71      | 1,53    | 1,52    | 64,3    | 60     | 27,46807 |
| INT00018  | 1     | 3       | 1   | 68      | 1,61    | 1,6     | 69      | 69,5   | 26,61934 |
| INT00020  | 1     | 3       | 1   | 72      | 1,53    | 1,53    | 56,8    | 55,8   | 24,26417 |
| INT00021  | 1     | 3       | 1   | 66      | 1,62    | 1,6     | 115,8   | 115,5  | 44,12437 |
| INT00023  | 1     | 3       | 1   | 72      | 1,49    | 1,48    | 65,7    | 64,3   | 29,59326 |
| INT00024  | 1     | 3       | 1   | 74      | 1,51    | 1,5     | 65,7    | 65,3   | 28,81453 |
| INT00026  | 1     | 3       | 1   | 65      | 1,58    | 1,57    | 87,1    | 87,1   | 34,89024 |
| INT00027  | 1     | 3       | 1   | 68      | 1,57    | 1,57    | 48,9    | 48,8   | 19,83853 |
| CTRL00041 | 2     | 4       | 1   | 71      | 1,52    | 1,52    | 55,6    | 59,2   | 24,0651  |
| CTRL00042 | 2     | 4       | 1   | 71      | 1,52    | 1,52    | 64,4    | 62,1   | 27,87396 |
| CTRL00043 | 2     | 4       | 1   | 75      | 1,63    | 1,63    | 61,1    | 59,4   | 22,99673 |
| CTRL00045 | 2     | 4       | 1   | 65      | 1,59    | 1,58    | 107,6   | 104,4  | 42,56161 |
| CTRL00047 | 2     | 4       | 1   | 83      | 1,61    | 1,61    | 71,9    | 71,1   | 27,73813 |
| CTRL00048 | 2     | 5       | 1   | 80      | 1,7     | 1,7     | 71,3    | 71,2   | 24,67128 |
| CTRL00049 | 2     | 5       | 1   | 72      | 1,62    | 1,62    | 76      | 73,3   | 28,959   |
| CTRL00050 | 2     | 5       | 1   | 85      | 1,67    | 1,67    | 65,4    | 66     | 23,45011 |
| CTRL00051 | 2     | 5       | 1   | 68      | 1,65    | 1,65    | 72,6    | 73,4   | 26,66667 |
| CTRL00052 | 2     | 5       | 1   | 77      | 1,62    | 1,62    | 60,9    | 62     | 23,2053  |
| CTRL00053 | 2     | 6       | 1   | 77      | 1,53    | 1,53    | 63      | 63     | 26,91273 |
| CTRL00054 | 2     | 6       | 1   | 66      | 1,57    | 1,57    | 83,8    | 85,3   | 33,99732 |
| CTRL00055 | 2     | 5       | 1   | 72      | 1,51    | 1,51    | 100,1   | 98,7   | 43,90158 |
| CTRL00056 | 2     | 5       | 1   | 72      | 1,61    | 1,61    | 81,8    | 80,7   | 31,55742 |
| CTRL00057 | 2     | 6       | 1   | 78      | 1,6     | 1,6     | 82,8    | 83,8   | 32,34375 |
| CTRL00058 | 2     | 6       | 1   | 75      | 1,64    | 1,63    | 69,5    | 69,2   | 25,84027 |
| CTRL00059 | 2     | 6       | 1   | 70      | 1,57    | 1,57    | 74,4    | 75     | 30,18378 |
| CTRL00061 | 2     | 5       | 1   | 81      | 1,57    | 1,57    | 65,8    | 64,3   | 26,69479 |
| CTRL00062 | 2     | 6       | 1   | 79      | 1,49    | 1,5     | 51,1    | 50,1   | 23,01698 |
| CTRL00063 | 2     | 5       | 1   | 70      | 1,47    | 1,46    | 60,9    | 61,9   | 28,1827  |
| CTRL00064 | 2     | 5       | 1   | 79      | 1,48    | 1,48    | 61,6    | 61,7   | 28,12272 |
| CTRL00065 | 2     | 6       | 1   | 65      | 1,6     | 1,6     | 98,9    | 94,3   | 38,63281 |

| B.M.lb   | Waist Circ.a | Waist Circ.b | Sub Scap.a | Sub Scap.b | Supra Iliac.a | Supra Iliac.b | Tricep a |
|----------|--------------|--------------|------------|------------|---------------|---------------|----------|
| 25,20821 | 90           | 84,4         | 23         | 26         | 24            | 18            | 20       |
| 36,26922 | 105,5        | 97,5         | 37         | 35         | 29            | 28            | 31       |
| 24,91119 | 78           | 78           | 18         | 19         | 15            | 12            | 18       |
| 26,69913 | 87,5         | 84           | 24         | 21         | 22            | 18            | 20       |
| 31,96921 | 101,5        | 97           | 35         | 33         | 35            | 33            | 30       |
| 38,6374  | 103          | 97,5         | 35         | 38         | 31            | 31            | 34       |
| 33,13915 | 100,5        | 94,9         | 25         | 24         | 27            | 22            | 21       |
| 24,90138 | 86           | 82,5         | 26         | 23         | 26            | 28            | 20       |
| 22,93759 | 81,5         | 75,5         | 15         | 14         | 14            | 11            | 16       |
| 30,0346  | 99,5         | 95,6         | 24         | 29         | 30            | 22            | 22       |
| 27,96492 | 91           | 89,5         | 23         | 20         | 31            | 23            | 19       |
| 27,24432 | 90           | 84,5         | 27         | 24         | 20            | 16            | 18       |
| 25,86923 | 89           | 85,5         | 25         | 21         | 21            | 19            | 24       |
| 23,91444 | 80,4         | 77           | 18         | 18         | 15            | 10            | 11       |
| 27,98323 | 87           | 88           | 21         | 22         | 23            | 20            | 20       |
| 25,96953 | 74,8         | 68,8         | 22         | 19         | 28            | 12            | 23       |
| 27,14844 | 89,5         | 87           | 27         | 25         | 28            | 27            | 16       |
| 23,83699 | 72,5         | 69,4         | 22         | 17         | 18            | 16            | 23       |
| 45,11719 | 116,5        | 110,8        | 35         | 35         | 34            | 30            | 25       |
| 29,35537 | 84,5         | 81,4         | 31         | 28         | 18            | 17            | 28       |
| 29,02222 | 84,5         | 83           | 29         | 29         | 28            | 29            | 24       |
| 35,33612 | 94,5         | 91,8         | 31         | 30         | 24            | 24            | 26       |
| 19,79796 | 67,2         | 67,2         | 17         | 17         | 10            | 8             | 15       |
| 25,62327 | 67           | 69           | 20         | 20         | 15            | 14            | 21       |
| 26,87846 | 94,4         | 86,2         | 27         | 25         | 22            | 20            | 21       |
| 22,35688 | 72,5         | 71,5         | 13         | 14         | 15            | 11            | 15       |
| 41,82022 | 115          | 109,5        | 37         | 38         | 39            | 38            | 29       |
| 27,4295  | 101,5        | 97,6         | 33         | 29         | 32            | 30            | 20       |
| 24,63668 | 88,5         | 86           | 25         | 24         | 15            | 13            | 11       |
| 27,93019 | 94,5         | 91,8         | 33         | 34         | 34            | 30            | 11       |
| 23,66524 | 91,4         | 91           | 26         | 23         | 20            | 15            | 13       |
| 26,96051 | 85,5         | 85,4         | 29         | 32         | 24            | 20            | 15       |
| 23,62445 | 81           | 81,5         | 29         | 29         | 18            | 24            | 11       |
| 26,91273 | 77           | 77,8         | 23         | 27         | 18            | 17            | 18       |
| 34,60587 | 101          | 101,2        | 34         | 32         | 28            | 26            | 33       |
| 43,28758 | 103,3        | 101,5        | 43         | 38         | 25            | 29            | 32       |
| 31,13306 | 97           | 96           | 30         | 29         | 22            | 20            | 13       |
| 32,73438 | 79,5         | 82,9         | 21         | 25         | 22            | 23            | 30       |
| 26,04539 | 87,4         | 87,1         | 24         | 24         | 20            | 21            | 17       |
| 30,4272  | 87,2         | 89           | 27         | 26         | 21            | 20            | 17       |
| 26,08625 | 84           | 81,8         | 14         | 24         | 25            | 19            | 16       |
| 22,26667 | 71           | 70           | 20         | 23         | 19            | 18            | 16       |
| 29,03922 | 79,5         | 81,6         | 28         | 27         | 27            | 25            | 19       |
| 28,16837 | 76,5         | 77,1         | 21         | 25         | 15            | 17            | 18       |
| 36,83594 | 104,6        | 99,5         | 39         | 34         | 26            | 26            | 28       |

| Tricep b | Bicep a | Bicep b | Tot. Skinfld a | Tot. Skinfld b | Body Density a | Body Density b | BF% a    |
|----------|---------|---------|----------------|----------------|----------------|----------------|----------|
| 17       | 11      | 8       | 78             | 69             | 1,02134204     | 1,024696507    | 34,65644 |
| 31       | 21      | 20      | 118            | 114            | 1,009609434    | 1,010552994    | 40,2886  |
| 17       | 8       | 7       | 59             | 55             | 1,029792323    | 1,031713151    | 30,67944 |
| 18       | 7       | 6       | 73             | 63             | 1,02518466     | 1,029215545    | 32,83984 |
| 27       | 20      | 21      | 120            | 114            | 1,013615581    | 1,015018994    | 38,35082 |
| 29       | 21      | 23      | 121            | 121            | 1,011358522    | 1,010952522    | 39,44068 |
| 25       | 15      | 14      | 88             | 85             | 1,019259592    | 1,019802608    | 35,64664 |
| 14       | 9       | 9       | 81             | 74             | 1,023963444    | 1,026030402    | 33,4157  |
| 11       | 5       | 6       | 50             | 42             | 1,03147889     | 1,036249295    | 29,89349 |
| 18       | 16      | 16      | 92             | 85             | 1,016825367    | 1,018990608    | 36,80926 |
| 17       | 10      | 9       | 83             | 69             | 1,02370208     | 1,028350507    | 33,53912 |
| 16       | 12      | 10      | 77             | 66             | 1,024943084    | 1,028754732    | 32,95365 |
| 23       | 11      | 9       | 81             | 72             | 1,024775444    | 1,027998053    | 33,03265 |
| 8        | 7       | 7       | 51             | 43             | 1,037027079    | 1,041695487    | 27,32601 |
| 19       | 12      | 15      | 76             | 76             | 1,022052744    | 1,022052744    | 34,31943 |
| 20       | 12      | 6       | 85             | 57             | 1,021020608    | 1,031953884    | 34,80902 |
| 16       | 15      | 12      | 86             | 80             | 1,021918598    | 1,023897331    | 34,383   |
| 20       | 15      | 13      | 78             | 66             | 1,02296604     | 1,027536732    | 33,88703 |
| 26       | 19      | 19      | 113            | 110            | 1,015260058    | 1,016402261    | 37,55981 |
| 24       | 17      | 12      | 94             | 81             | 1,017860945    | 1,021933444    | 36,31397 |
| 26       | 16      | 15      | 97             | 99             | 1,016189381    | 1,015630983    | 37,11393 |
| 26       | 19      | 19      | 100            | 99             | 1,01901        | 1,018878983    | 35,7656  |
| 13       | 6       | 5       | 48             | 43             | 1,037873802    | 1,040883487    | 26,9366  |
| 20       | 11      | 12      | 67             | 66             | 1,027531287    | 1,027942732    | 31,73716 |
| 19       | 7       | 12      | 77             | 76             | 1,023725084    | 1,024082744    | 33,52825 |
| 14       | 7       | 7       | 50             | 46             | 1,03391489     | 1,036196257    | 28,76281 |
| 35       | 20      | 21      | 125            | 132            | 1,012904669    | 1,011413842    | 38,69357 |
| 17       | 11      | 11      | 96             | 87             | 1,012818912    | 1,015512287    | 38,73495 |
| 8        | 8       | 7       | 59             | 52             | 1,027356323    | 1,030405789    | 31,8192  |
| 10       | 9       | 8       | 87             | 82             | 1,019978287    | 1,021597727    | 35,30445 |
| 12       | 10      | 8       | 69             | 58             | 1,021042507    | 1,025388036    | 34,79862 |
| 12       | 11      | 11      | 79             | 75             | 1,024241493    | 1,02566314     | 33,28446 |
| 13       | 9       | 10      | 67             | 76             | 1,025095287    | 1,021240744    | 32,88194 |
| 20       | 15      | 13      | 74             | 77             | 1,022376402    | 1,020883084    | 34,1661  |
| 36       | 26      | 28      | 121            | 122            | 1,013388522    | 1,012757331    | 38,46024 |
| 30       | 10      | 13      | 110            | 110            | 1,013560261    | 1,012748261    | 38,37747 |
| 11       | 12      | 11      | 77             | 71             | 1,023319084    | 1,025538724    | 33,72009 |
| 34       | 15      | 18      | 88             | 100            | 1,017229592    | 1,013732       | 36,61581 |
| 17       | 11      | 10      | 72             | 72             | 1,023938053    | 1,023938053    | 33,42768 |
| 18       | 11      | 13      | 76             | 77             | 1,024488744    | 1,024131084    | 33,16783 |
| 19       | 9       | 8       | 64             | 70             | 1,024724662    | 1,021866823    | 33,05659 |
| 17       | 8       | 8       | 63             | 66             | 1,025967545    | 1,024288732    | 32,4714  |
| 19       | 10      | 13      | 84             | 84             | 1,021750405    | 1,021750405    | 34,46274 |
| 17       | 11      | 12      | 65             | 71             | 1,025112459    | 1,022696724    | 32,87385 |
| 32       | 18      | 16      | 111            | 108            | 1,016154652    | 1,016904303    | 37,13057 |

| BF% b    | 6 Min Walka | 6 Min Walkb | Dynamic 6 Step a | Dynamic 6 Step b | Dynamic 10Ma |
|----------|-------------|-------------|------------------|------------------|--------------|
| 33,06986 | 537,5       | 565,5       | 9,1              | 3,9              | 45,9         |
| 39,83082 | 387,5       | 420         | 5,4              | 4,9              | 30,1         |
| 29,78452 | 437,5       | 524,5       | 6                | 4,7              | 36,6         |
| 30,94882 | 422,5       | 467,5       | 7,4              | 5,1              | 59,5         |
| 37,6756  | 431,2       | 470,6       | 6,3              | 8,1              | 39,6         |
| 39,63724 | 509,5       | 526         | 6,9              | 8                | 54,9         |
| 35,38805 | 367,5       | 434,5       | 7,8              | 7,5              | 66,7         |
| 32,44184 | 522         | 566,1       | 7,9              | 5                | 47,1         |
| 27,68428 | 524,4       | 541         | 9,1              | 5,4              | 63,5         |
| 35,77484 | 394,5       | 422,5       | 14,2             | 9,7              | 65,8         |
| 31,35339 | 500,25      | 537,6       | 3,8              | 3,8              | 31,5         |
| 31,16425 | 503,55      | 541,1       | 8,2              | 4                | 52           |
| 31,51842 | 438,5       | 565,5       | 9,9              | 5,9              | 48,7         |
| 25,18685 | 457,5       | 636,2       | 9,1              | 5                | 38,4         |
| 34,31943 | 420         | 403,8       | 8,3              | 7,1              | 41,9         |
| 29,6726  | 417,5       | 507,8       | 5                | 4,2              | 34           |
| 33,44691 | 515         | 664,1       | 9                | 5,9              | 64           |
| 31,7346  | 480         | 550,6       | 8,1              | 6,7              | 51,8         |
| 37,0119  | 443         | 420         | 5,8              | 5,7              | 22,5         |
| 34,37597 | 537,5       | 569,1       | 6,7              | 2,8              | 38,5         |
| 37,38174 | 454,5       | 487,5       | 6,1              | 3,7              | 40           |
| 35,82806 | 548,5       | 542,6       | 6,8              | 4,2              | 38,6         |
| 25,55755 | 525,5       | 567,6       | 6,7              | 6,3              | 37,3         |
| 31,54434 | 515,5       | 499         | 5,1              | 6,5              | 36,2         |
| 33,35938 | 323,5       | 351,5       | 10               | 7,2              | 43,3         |
| 27,70873 | 595,5       | 600,5       | 5,2              | 5,6              | 32,3         |
| 39,41391 | 338,5       | 397,6       | 6,5              | 6,1              | 50           |
| 37,43871 | 445,5       | 430         | 10,6             | 11,8             | 71,6         |
| 30,39326 | 454,5       | 492,5       | 9,6              | 7,7              | 41,7         |
| 34,53514 | 590,5       | 612,6       | 3,9              | 4,1              | 22,5         |
| 32,74408 | 427,6       | 406         | 7                | 6,7              | 51,3         |
| 32,61459 | 630         | 654,4       | 8,8              | 6,1              | 48,6         |
| 34,70452 | 623,8       | 647,5       | 5,4              | 6,9              | 38,1         |
| 34,87433 | 538,2       | 522,4       | 7,7              | 10,5             | 55           |
| 38,76467 | 475         | 478,7       | 12,5             | 9,5              | 88,2         |
| 38,76904 | 295         | 284,8       | 6,7              | 10,6             | 48,1         |
| 32,67314 | 424,5       | 502,6       | 5,7              | 4,6              | 32,6         |
| 38,29474 | 515,1       | 525,1       | 8,5              | 10,4             | 43,6         |
| 33,42768 | 560         | 574,9       | 8,9              | 6,1              | 66,9         |
| 33,33656 | 551,5       | 602,4       | 4,5              | 5                | 25           |
| 34,40755 | 485,5       | 507,7       | 9,1              | 14,7             | 56,6         |
| 33,26217 | 530         | 505         | 6,1              | 6,4              | 43,3         |
| 34,46274 | 437,6       | 469,8       | 8,1              | 6,5              | 56,8         |
| 34,01446 | 437,5       | 438,6       | 8                | 6,4              | 54,4         |
| 36,77147 | 584,8       | 547,4       | 7,7              | 6,6              | 36,9         |

| Dynamic 10Mb | Timed Up | Timed Up | Grip Left 1a | Grip Left 2a | Grip Left 1b | Grip Left 2l | Grip Left A |
|--------------|----------|----------|--------------|--------------|--------------|--------------|-------------|
| 28,3         | 5,83     | 5,9      | 22,9         | 21,8         | 21,8         | 24,3         | 22,35       |
| 24,4         | 7,9      | 6,5      | 12,4         | 11,4         | 15,1         | 14,7         | 11,9        |
| 33,8         | 6,53     | 5,9      | 20,3         | 17,1         | 20,1         | 18           | 18,7        |
| 42,3         | 7,85     | 6,4      | 20,4         | 20,1         | 20,4         | 20,1         | 20,25       |
| 50,3         | 7,4      | 6,7      | 25,1         | 22,9         | 24           | 21,2         | 24          |
| 38,8         | 7,4      | 6,2      | 27,2         | 24           | 26,4         | 23,2         | 25,6        |
| 45,7         | 8        | 6,4      | 18           | 18           | 20,4         | 19,6         | 18          |
| 31,1         | 5,9      | 5,7      | 16           | 16           | 16,6         | 16,1         | 16          |
| 37           | 7        | 5,8      | 17,6         | 19,9         | 16           | 18,7         | 18,75       |
| 46,2         | 9,8      | 8,1      | 22,5         | 20,5         | 22,8         | 21,7         | 21,5        |
| 29,2         | 6,8      | 6        | 18,4         | 20           | 19,3         | 21,1         | 19,2        |
| 29,1         | 7        | 7        | 23,9         | 22,8         | 21,8         | 21,8         | 23,35       |
| 43,7         | 6        | 6,4      | 23,9         | 25,7         | 24,2         | 23,7         | 24,8        |
| 30,8         | 7,5      | 6,3      | 35,1         | 31           | 30,7         | 32,4         | 33,05       |
| 41,7         | 8,5      | 7,3      | 15,7         | 13           | 16,2         | 11,4         | 14,35       |
| 27,4         | 8,7      | 5,8      | 19,3         | 19,4         | 18,6         | 16           | 19,35       |
| 37,1         | 7,1      | 4,9      | 26,7         | 26,7         | 25,8         | 26,7         | 26,7        |
| 39,8         | 7        | 5,9      | 16,9         | 15           | 16,4         | 15           | 15,95       |
| 26,6         | 6,6      | 5,3      | 25,4         | 25,6         | 27,2         | 27,1         | 25,5        |
| 21,6         | 7,4      | 5,2      | 13,1         | 15,3         | 13,4         | 16,1         | 14,2        |
| 28,8         | 8,7      | 6        | 17,4         | 15,6         | 17,4         | 16,6         | 16,5        |
| 26,6         | 6,6      | 6        | 19,3         | 18,7         | 19,7         | 15,6         | 19          |
| 45,4         | 6,3      | 5,4      | 19,9         | 19           | 20,8         | 20,8         | 19,45       |
| 42,8         | 8,7      | 6,5      | 20,1         | 23,8         | 13,4         | 19,1         | 21,95       |
| 43,3         | 12,4     | 12,8     | 16,6         | 17,6         | 18,7         | 17,4         | 17,1        |
| 30,6         | 6,9      | 5,9      | 20,3         | 20,3         | 22,9         | 21,1         | 20,3        |
| 37,3         | 6,8      | 6,5      | 23,2         | 18,1         | 13,1         | 15,4         | 20,65       |
| 48,9         | 9,9      | 9,3      | 14           | 13,9         | 10,6         | 10,9         | 13,95       |
| 43,2         | 8,2      | 7,6      | 35,4         | 34,4         | 36,4         | 35,3         | 34,9        |
| 21,3         | 5,3      | 5,9      | 32,6         | 31,9         | 31,4         | 28,3         | 32,25       |
| 50,4         | 7,9      | 7,1      | 24,2         | 24,2         | 24,7         | 24           | 24,2        |
| 33,7         | 5,3      | 5,7      | 27,6         | 27,6         | 30,1         | 30,3         | 27,6        |
| 39,6         | 6,1      | 6,9      | 15           | 16,7         | 12,3         | 15,4         | 15,85       |
| 66,7         | 6,1      | 7,4      | 24,7         | 22,6         | 21,9         | 20,3         | 23,65       |
| 69,2         | 6,6      | 6,8      | 17,1         | 17,4         | 17,4         | 17           | 17,25       |
| 62,2         | 9,7      | 9,3      | 13,1         | 12,3         | 10,4         | 11,3         | 12,7        |
| 28,2         | 7,4      | 6,8      | 34           | 25,7         | 27,9         | 25,3         | 29,85       |
| 58,8         | 6,5      | 8,8      | 18,4         | 18,7         | 20,1         | 20,7         | 18,55       |
| 40           | 6,6      | 8,7      | 28,2         | 30,7         | 26,7         | 25,4         | 29,45       |
| 32,2         | 5,3      | 5,1      | 28,3         | 30,7         | 31,8         | 34,4         | 29,5        |
| 70,7         | 6,9      | 8        | 18,6         | 20,3         | 18,1         | 18,1         | 19,45       |
| 39,8         | 6,5      | 7,4      | 18,1         | 18,3         | 17,4         | 17,5         | 18,2        |
| 45,8         | 7,3      | 7,6      | 17,9         | 15,1         | 15,3         | 15,7         | 16,5        |
| 38           | 6,1      | 7        | 13,5         | 13           | 14,9         | 14,1         | 13,25       |
| 34,9         | 7,1      | 7,6      | 21,3         | 18,6         | 24,7         | 24,6         | 19,95       |

| Grip Left A | Grip Right 1 | Grip Right 2 | Grip Right 3 | Grip Right 4 | Grip Right 5 | Grip Right 6 | F.R 1a | F.R 1b |
|-------------|--------------|--------------|--------------|--------------|--------------|--------------|--------|--------|
| 23,05       | 22,2         | 26,6         | 24,2         | 27,2         | 24,4         | 25,7         | 75     | 90,1   |
| 14,9        | 11,6         | 13,1         | 14,7         | 14,7         | 12,35        | 14,7         | 79     | 84,1   |
| 19,05       | 22,8         | 20,4         | 21,4         | 19,1         | 21,6         | 20,25        | 77     | 80     |
| 20,25       | 19,7         | 19,7         | 19,7         | 19,7         | 19,7         | 19,7         | 75,5   | 81     |
| 22,6        | 23,9         | 24,4         | 22,6         | 24,7         | 24,15        | 23,65        | 80     | 82,6   |
| 24,8        | 22,9         | 27,6         | 25,3         | 26,9         | 25,25        | 26,1         | 90     | 92,5   |
| 20          | 14,9         | 14,1         | 21,3         | 18,6         | 14,5         | 19,95        | 76,5   | 83,7   |
| 16,35       | 15,4         | 13,9         | 16,3         | 16,4         | 14,65        | 16,35        | 74     | 82,2   |
| 17,35       | 19,4         | 21           | 18,7         | 17,9         | 20,2         | 18,3         | 82     | 89,8   |
| 22,25       | 20,3         | 21,3         | 23,3         | 22,4         | 20,8         | 22,85        | 79,5   | 88,9   |
| 20,2        | 13,7         | 15           | 17,4         | 15,3         | 14,35        | 16,35        | 96,5   | 94,4   |
| 21,8        | 29,4         | 28,1         | 26,5         | 24,3         | 28,75        | 25,4         | 77,5   | 88,7   |
| 23,95       | 24,2         | 21,9         | 24,3         | 23,5         | 23,05        | 23,9         | 88,4   | 91     |
| 31,55       | 34,1         | 34,9         | 32,6         | 31,1         | 34,5         | 31,85        | 82,5   | 81,6   |
| 13,8        | 12,1         | 13,4         | 14,3         | 13,6         | 12,75        | 13,95        | 79     | 80,5   |
| 17,3        | 19,4         | 18,4         | 20,3         | 20,4         | 18,9         | 20,35        | 82,6   | 84,6   |
| 26,25       | 25,6         | 25,8         | 22,2         | 21,8         | 25,7         | 22           | 84     | 87,5   |
| 15,7        | 18,6         | 19,5         | 20,4         | 18           | 19,05        | 19,2         | 64,4   | 81     |
| 27,15       | 27,6         | 27,6         | 28,1         | 29,6         | 27,6         | 28,85        | 74,5   | 80,2   |
| 14,75       | 15,3         | 20,7         | 17,4         | 18,9         | 18           | 18,15        | 78,8   | 82,2   |
| 17          | 19,9         | 15,6         | 16,5         | 16,3         | 17,75        | 16,4         | 81,2   | 78,5   |
| 17,65       | 19           | 20,2         | 20,3         | 16,1         | 19,6         | 18,2         | 77,7   | 80     |
| 20,8        | 24,9         | 25,8         | 23,9         | 24           | 25,35        | 23,95        | 91,2   | 90,5   |
| 16,25       | 21,9         | 23,1         | 19,3         | 14           | 22,5         | 16,65        | 72,5   | 73,8   |
| 18,05       | 16,1         | 13,4         | 15,9         | 15,9         | 14,75        | 15,9         | 67,5   | 74,2   |
| 22          | 23,6         | 20,1         | 20,7         | 22,8         | 21,85        | 21,75        | 86,2   | 89,2   |
| 14,25       | 22,7         | 21,9         | 22,6         | 21,1         | 22,3         | 21,85        | 76     | 81,5   |
| 10,75       | 11,6         | 12,7         | 10,3         | 8,8          | 12,15        | 9,55         | 80,1   | 77,9   |
| 35,85       | 33,4         | 34,1         | 32           | 30,3         | 33,75        | 31,15        | 85,8   | 86,2   |
| 29,85       | 36,1         | 37,1         | 38,3         | 36,4         | 36,6         | 37,35        | 85,1   | 86,2   |
| 24,35       | 24,7         | 25,3         | 26,8         | 25           | 25           | 25,9         | 85,5   | 83,2   |
| 30,2        | 27,4         | 28,6         | 31,3         | 35           | 28           | 33,15        | 85     | 84,8   |
| 13,85       | 16           | 16,4         | 16,7         | 16,6         | 16,2         | 16,65        | 89,1   | 82,2   |
| 21,1        | 24,2         | 21,8         | 20,6         | 21,7         | 23           | 21,15        | 89,9   | 83,1   |
| 17,2        | 18,1         | 17,9         | 16,6         | 16,7         | 18           | 16,65        | 85     | 80,8   |
| 10,85       | 15,1         | 15,4         | 18,6         | 16,3         | 15,25        | 17,45        | 75,7   | 78,3   |
| 26,6        | 37,1         | 35,7         | 26,5         | 30,7         | 36,4         | 28,6         | 84,6   | 78     |
| 20,4        | 24,6         | 24,2         | 23,6         | 23,8         | 24,4         | 23,7         | 87,8   | 84     |
| 26,05       | 30,3         | 31,4         | 22,6         | 21,7         | 30,85        | 22,15        | 97     | 84,7   |
| 33,1        | 33,4         | 34,1         | 35,3         | 32,3         | 33,75        | 33,8         | 90,2   | 85,3   |
| 18,1        | 16,1         | 19,4         | 18,9         | 20,8         | 17,75        | 19,85        | 77,8   | 79,1   |
| 17,45       | 16,7         | 15,3         | 19           | 16           | 16           | 17,5         | 76,7   | 84,2   |
| 15,5        | 18,9         | 17,1         | 21,3         | 16,6         | 18           | 18,95        | 75,1   | 74,7   |
| 14,5        | 14,1         | 11,7         | 12,2         | 12,1         | 12,9         | 12,15        | 86,1   | 81,2   |
| 24,65       | 18,3         | 17,1         | 22,2         | 20,8         | 17,7         | 21,5         | 84,6   | 83     |

| F.R 2a | F.R 2b | F.R 3a | F.R 3b | F.R Ave a | F.R Ave b | Ave Rt of Mistakes a |
|--------|--------|--------|--------|-----------|-----------|----------------------|
| 78     | 89,9   | 79,5   | 91     | 77,5      | 90,33333  | 2115                 |
| 79,5   | 86,1   | 80     | 87,2   | 79,5      | 85,8      | 1214                 |
| 79     | 83,4   | 78,5   | 82,5   | 78,16667  | 81,96667  | 1573                 |
| 77     | 81,3   | 77,5   | 82,3   | 76,66667  | 81,53333  | 2013                 |
| 78     | 83,1   | 79,5   | 93,2   | 79,16667  | 86,3      | 1708                 |
| 90,5   | 93,9   | 91     | 94,3   | 90,5      | 93,56667  | 1450                 |
| 75     | 83,7   | 77     | 83,2   | 76,16667  | 83,53333  | 2130                 |
| 80     | 83,5   | 82,5   | 83,8   | 78,83333  | 83,16667  | 2054                 |
| 82,8   | 89     | 84,3   | 89,4   | 83,03333  | 89,4      | 2112                 |
| 78     | 87,7   | 77,2   | 89     | 78,23333  | 88,53333  | 1667                 |
| 98     | 95,5   | 95,7   | 96     | 96,73333  | 95,3      | 0                    |
| 74     | 88,5   | 76,4   | 89,1   | 75,96667  | 88,76667  | 2314                 |
| 87,4   | 89,5   | 86,2   | 90,2   | 87,33333  | 90,23333  | 1487                 |
| 81,4   | 82     | 83     | 83,4   | 82,3      | 82,33333  | 0                    |
| 77,6   | 80,3   | 81,2   | 83,3   | 79,26667  | 81,36667  | 1855                 |
| 82,5   | 85,1   | 84,8   | 87,2   | 83,3      | 85,63333  | 1567                 |
| 82     | 86     | 82,8   | 88,4   | 82,93333  | 87,3      | 1819                 |
| 65,4   | 79,8   | 66     | 78,8   | 65,26667  | 79,86667  | 1624                 |
| 73,8   | 83,3   | 75,5   | 83,5   | 74,6      | 82,33333  | 1260                 |
| 80     | 83,5   | 81,2   | 84,2   | 80        | 83,3      | 1284                 |
| 83,5   | 79,5   | 83     | 80,2   | 82,56667  | 79,4      | 1574                 |
| 80     | 83,4   | 83,6   | 84,5   | 80,43333  | 82,63333  | 1647                 |
| 90,5   | 90,1   | 91     | 91,6   | 90,9      | 90,73333  | 0                    |
| 74     | 76,4   | 78     | 74,5   | 74,83333  | 74,9      | 1412                 |
| 70,7   | 73,5   | 71,5   | 74,4   | 69,9      | 74,03333  | 1571                 |
| 88     | 89,5   | 88,5   | 91,4   | 87,56667  | 90,03333  | 1566                 |
| 79,4   | 80     | 79,5   | 83,3   | 78,3      | 81,6      | 1202                 |
| 80,1   | 78     | 81,3   | 81     | 80,5      | 78,96667  | 1082                 |
| 87,5   | 87,3   | 88     | 90,2   | 87,1      | 87,9      | 2297                 |
| 85     | 85,5   | 85,3   | 87,2   | 85,13333  | 86,3      | 1155                 |
| 86,1   | 87,5   | 84,4   | 84,5   | 85,33333  | 85,06667  | 2034                 |
| 83,2   | 83,2   | 81,5   | 82,3   | 83,23333  | 83,43333  | 1416                 |
| 89,5   | 87     | 89,6   | 90,1   | 89,4      | 86,43333  | 1688                 |
| 88,5   | 83,5   | 90,4   | 81,4   | 89,6      | 82,66667  | 1509                 |
| 86,4   | 83,8   | 85,6   | 81,4   | 85,66667  | 82        | 0                    |
| 76,1   | 78,3   | 76,2   | 80,2   | 76        | 78,93333  | 1873                 |
| 83,8   | 76,2   | 84,5   | 78,2   | 84,3      | 77,46667  | 1235                 |
| 89,7   | 85,9   | 86,4   | 87,8   | 87,96667  | 85,9      | 1239                 |
| 94,6   | 85,6   | 94,9   | 83,6   | 95,5      | 84,63333  | 1194                 |
| 90,5   | 81,1   | 90     | 83     | 90,23333  | 83,13333  | 2057                 |
| 78     | 80,1   | 78,4   | 79     | 78,06667  | 79,4      | 1421                 |
| 79,5   | 82,2   | 80,4   | 83     | 78,86667  | 83,13333  | 1792                 |
| 75,2   | 74,4   | 74     | 73,5   | 74,76667  | 74,2      | 1749                 |
| 84,1   | 83,5   | 81,5   | 86,8   | 83,9      | 83,83333  | 1650                 |
| 85,5   | 84,6   | 85,8   | 84,1   | 85,3      | 83,9      | 1761                 |

| Ave Rt of Mistakes +1a | LOG Ave Rt of Mistakes +1a | Ave Rt of Mistakes b | Ave Rt of Mistakes +1b |
|------------------------|----------------------------|----------------------|------------------------|
| 2116                   | 3,325515663                | 1865                 | 1866                   |
| 1215                   | 3,084576278                | 1260                 | 1261                   |
| 1574                   | 3,197004728                | 1833                 | 1834                   |
| 2014                   | 3,304059466                | 1879                 | 1880                   |
| 1709                   | 3,232742063                | 1453                 | 1454                   |
| 1451                   | 3,161667412                | 1009                 | 1010                   |
| 2131                   | 3,32858345                 | 1321                 | 1322                   |
| 2055                   | 3,312811826                | 0                    | 1                      |
| 2113                   | 3,324899497                | 1994                 | 1995                   |
| 1668                   | 3,222196046                | 1162                 | 1163                   |
| 1                      | 0                          | 1087                 | 1088                   |
| 2315                   | 3,364550995                | 1616                 | 1617                   |
| 1488                   | 3,172602931                | 0                    | 1                      |
| 1                      | 0                          | 1648                 | 1649                   |
| 1856                   | 3,268577972                | 2368                 | 2369                   |
| 1568                   | 3,195346058                | 1458                 | 1459                   |
| 1820                   | 3,260071388                | 2026                 | 2027                   |
| 1625                   | 3,210853365                | 1944                 | 1945                   |
| 1261                   | 3,100715087                | 1556                 | 1557                   |
| 1285                   | 3,108903128                | 1577                 | 1578                   |
| 1575                   | 3,197280558                | 1900                 | 1901                   |
| 1648                   | 3,216957207                | 0                    | 1                      |
| 1                      | 0                          | 0                    | 1                      |
| 1413                   | 3,150142162                | 2071                 | 2072                   |
| 1572                   | 3,196452542                | 2027                 | 2028                   |
| 1567                   | 3,195068996                | 1520                 | 1521                   |
| 1203                   | 3,080265627                | 0                    | 1                      |
| 1083                   | 3,034628457                | 1510                 | 1511                   |
| 2298                   | 3,361350024                | 2078                 | 2079                   |
| 1156                   | 3,062957834                | 1126                 | 1127                   |
| 2035                   | 3,308564414                | 1715                 | 1716                   |
| 1417                   | 3,15136985                 | 1558                 | 1559                   |
| 1689                   | 3,22762965                 | 1502                 | 1503                   |
| 1510                   | 3,178976947                | 2166                 | 2167                   |
| 1                      | 0                          | 0                    | 1                      |
| 1874                   | 3,272769587                | 2077                 | 2078                   |
| 1236                   | 3,092018471                | 2245                 | 2246                   |
| 1240                   | 3,093421685                | 0                    | 1                      |
| 1195                   | 3,077367905                | 1822                 | 1823                   |
| 2058                   | 3,31344537                 | 1772                 | 1773                   |
| 1422                   | 3,152899596                | 2698                 | 2699                   |
| 1793                   | 3,25358029                 | 1764                 | 1765                   |
| 1750                   | 3,243038049                | 1961                 | 1962                   |
| 1651                   | 3,217747073                | 1596                 | 1597                   |
| 1762                   | 3,246005904                | 1918                 | 1919                   |



| LOG Ave Rt of Mistakes +1b | Total Mistakes a | Total Mistakes b | % Total Mistakes a |
|----------------------------|------------------|------------------|--------------------|
| 3,270911639                | 6                | 13               | 18,75              |
| 3,100715087                | 9                | 11               | 28,125             |
| 3,263399331                | 9                | 13               | 28,125             |
| 3,274157849                | 9                | 7                | 28,125             |
| 3,162564407                | 6                | 3                | 18,75              |
| 3,004321374                | 10               | 1                | 31,25              |
| 3,121231455                | 6                | 1                | 18,75              |
| 0                          | 10               | 0                | 31,25              |
| 3,2999429                  | 5                | 6                | 15,625             |
| 3,065579715                | 6                | 5                | 18,75              |
| 3,036628895                | 0                | 1                | 0                  |
| 3,20871002                 | 4                | 0                | 12,5               |
| 0                          | 2                | 0                | 6,25               |
| 3,217220656                | 0                | 1                | 0                  |
| 3,374565061                | 14               | 11               | 43,75              |
| 3,164055292                | 11               | 2                | 34,375             |
| 3,306853749                | 5                | 1                | 15,625             |
| 3,288919606                | 22               | 8                | 68,75              |
| 3,192288613                | 3                | 0                | 9,375              |
| 3,198106999                | 8                | 4                | 25                 |
| 3,278982117                | 9                | 4                | 28,125             |
| 0                          | 4                | 0                | 12,5               |
| 0                          | 0                | 0                | 0                  |
| 3,316389751                | 18               | 6                | 56,25              |
| 3,307067951                | 6                | 6                | 18,75              |
| 3,182129214                | 2                | 1                | 6,25               |
| 0                          | 4                | 0                | 12,5               |
| 3,179264464                | 6                | 2                | 18,75              |
| 3,317854489                | 8                | 3                | 25                 |
| 3,051923916                | 4                | 2                | 12,5               |
| 3,234517284                | 9                | 11               | 28,125             |
| 3,192846115                | 1                | 4                | 3,125              |
| 3,176958981                | 9                | 5                | 28,125             |
| 3,335858911                | 6                | 5                | 18,75              |
| 0                          | 0                | 0                | 0                  |
| 3,317645543                | 2                | 9                | 6,25               |
| 3,351409752                | 9                | 13               | 28,125             |
| 0                          | 16               | 0                | 50                 |
| 3,260786669                | 7                | 8                | 21,875             |
| 3,248708736                | 1                | 2                | 3,125              |
| 3,431202885                | 1                | 1                | 3,125              |
| 3,24674471                 | 14               | 7                | 43,75              |
| 3,292699003                | 11               | 3                | 34,375             |
| 3,203304916                | 11               | 19               | 34,375             |
| 3,283074975                | 10               | 15               | 31,25              |

| % Total Mistakes b | Total Missed Resp. a | Total Missed Resp. b | Total Correct a | Total Correct b |
|--------------------|----------------------|----------------------|-----------------|-----------------|
| 40,625             | 12                   | 3                    | 14              | 16              |
| 34,375             | 2                    | 0                    | 21              | 21              |
| 40,625             | 11                   | 5                    | 12              | 14              |
| 21,875             | 8                    | 2                    | 15              | 23              |
| 9,375              | 9                    | 2                    | 17              | 27              |
| 3,125              | 6                    | 0                    | 16              | 31              |
| 3,125              | 3                    | 0                    | 23              | 31              |
| 0                  | 1                    | 0                    | 21              | 32              |
| 18,75              | 5                    | 2                    | 22              | 24              |
| 15,625             | 1                    | 0                    | 25              | 27              |
| 3,125              | 1                    | 0                    | 31              | 31              |
| 0                  | 2                    | 0                    | 26              | 32              |
| 0                  | 0                    | 0                    | 30              | 32              |
| 3,125              | 0                    | 0                    | 32              | 31              |
| 34,375             | 8                    | 8                    | 10              | 13              |
| 6,25               | 1                    | 0                    | 20              | 30              |
| 3,125              | 7                    | 1                    | 20              | 30              |
| 25                 | 1                    | 3                    | 9               | 21              |
| 0                  | 1                    | 0                    | 28              | 32              |
| 12,5               | 1                    | 1                    | 23              | 27              |
| 12,5               | 4                    | 2                    | 19              | 26              |
| 0                  | 0                    | 0                    | 28              | 32              |
| 0                  | 0                    | 1                    | 32              | 31              |
| 18,75              | 2                    | 11                   | 12              | 15              |
| 18,75              | 10                   | 9                    | 16              | 17              |
| 3,125              | 0                    | 0                    | 30              | 31              |
| 0                  | 1                    | 0                    | 27              | 32              |
| 6,25               | 3                    | 0                    | 23              | 30              |
| 9,375              | 3                    | 24                   | 21              | 5               |
| 6,25               | 2                    | 0                    | 26              | 30              |
| 34,375             | 12                   | 6                    | 11              | 15              |
| 12,5               | 0                    | 0                    | 31              | 28              |
| 15,625             | 4                    | 3                    | 19              | 24              |
| 15,625             | 12                   | 9                    | 14              | 18              |
| 0                  | 0                    | 0                    | 32              | 32              |
| 28,125             | 3                    | 2                    | 27              | 21              |
| 40,625             | 9                    | 5                    | 14              | 14              |
| 0                  | 0                    | 0                    | 16              | 32              |
| 25                 | 0                    | 0                    | 25              | 24              |
| 6,25               | 2                    | 1                    | 29              | 29              |
| 3,125              | 0                    | 0                    | 31              | 31              |
| 21,875             | 2                    | 0                    | 16              | 25              |
| 9,375              | 2                    | 3                    | 19              | 26              |
| 59,375             | 4                    | 1                    | 17              | 12              |
| 46,875             | 1                    | 1                    | 21              | 16              |

| % Total Correct a | LOG % Total Correc | % Total Correct b | LOG % Total Correc |
|-------------------|--------------------|-------------------|--------------------|
| 43,75             | 1,640978057        | 50                | 1,698970004        |
| 65,625            | 1,817069316        | 65,625            | 1,817069316        |
| 37,5              | 1,574031268        | 43,75             | 1,640978057        |
| 46,875            | 1,670941281        | 71,875            | 1,856577858        |
| 53,125            | 1,725298943        | 84,375            | 1,926213786        |
| 50                | 1,698970004        | 96,875            | 1,986211716        |
| 71,875            | 1,856577858        | 96,875            | 1,986211716        |
| 65,625            | 1,817069316        | 100               | 2                  |
| 68,75             | 1,837272703        | 75                | 1,875061263        |
| 78,125            | 1,89279003         | 84,375            | 1,926213786        |
| 96,875            | 1,986211716        | 96,875            | 1,986211716        |
| 81,25             | 1,90982337         | 100               | 2                  |
| 93,75             | 1,971971276        | 100               | 2                  |
| 100               | 2                  | 96,875            | 1,986211716        |
| 31,25             | 1,494850022        | 40,625            | 1,608793374        |
| 62,5              | 1,795880017        | 93,75             | 1,971971276        |
| 62,5              | 1,795880017        | 93,75             | 1,971971276        |
| 28,125            | 1,449092531        | 65,625            | 1,817069316        |
| 87,5              | 1,942008053        | 100               | 2                  |
| 71,875            | 1,856577858        | 84,375            | 1,926213786        |
| 59,375            | 1,773603623        | 81,25             | 1,90982337         |
| 87,5              | 1,942008053        | 100               | 2                  |
| 100               | 2                  | 96,875            | 1,986211716        |
| 37,5              | 1,574031268        | 46,875            | 1,670941281        |
| 50                | 1,698970004        | 53,125            | 1,725298943        |
| 93,75             | 1,971971276        | 96,875            | 1,986211716        |
| 84,375            | 1,926213786        | 100               | 2                  |
| 71,875            | 1,856577858        | 93,75             | 1,971971276        |
| 65,625            | 1,817069316        | 15,625            | 1,193820026        |
| 81,25             | 1,90982337         | 93,75             | 1,971971276        |
| 34,375            | 1,536242707        | 46,875            | 1,670941281        |
| 96,875            | 1,986211716        | 87,5              | 1,942008053        |
| 59,375            | 1,773603623        | 75                | 1,875061263        |
| 43,75             | 1,640978057        | 56,25             | 1,750122527        |
| 100               | 2                  | 100               | 2                  |
| 84,375            | 1,926213786        | 65,625            | 1,817069316        |
| 43,75             | 1,640978057        | 43,75             | 1,640978057        |
| 50                | 1,698970004        | 100               | 2                  |
| 78,125            | 1,89279003         | 75                | 1,875061263        |
| 90,625            | 1,95724802         | 90,625            | 1,95724802         |
| 96,875            | 1,986211716        | 96,875            | 1,986211716        |
| 50                | 1,698970004        | 78,125            | 1,89279003         |
| 59,375            | 1,773603623        | 81,25             | 1,90982337         |
| 53,125            | 1,725298943        | 37,5              | 1,574031268        |
| 65,625            | 1,817069316        | 50                | 1,698970004        |

| Ave Rt of All Correct Resp. a | LOG Ave Rt of All Correct Resp. a | Ave Rt of All Correct Resp. b |
|-------------------------------|-----------------------------------|-------------------------------|
| 2125                          | 3,327358934                       | 1789                          |
| 1844                          | 3,265760917                       | 1655                          |
| 1965                          | 3,293362555                       | 1815                          |
| 2038                          | 3,30920418                        | 1722                          |
| 1622                          | 3,21005085                        | 1462                          |
| 1370                          | 3,136720567                       | 1354                          |
| 1900                          | 3,278753601                       | 1588                          |
| 1467                          | 3,166430114                       | 1559                          |
| 2021                          | 3,305566314                       | 1768                          |
| 1566                          | 3,194791758                       | 1422                          |
| 1691                          | 3,228143608                       | 1198                          |
| 1914                          | 3,281941933                       | 1541                          |
| 1583                          | 3,199480915                       | 1457                          |
| 1589                          | 3,201123897                       | 1663                          |
| 1763                          | 3,246252312                       | 2190                          |
| 1638                          | 3,214313897                       | 1385                          |
| 1514                          | 3,180125875                       | 1407                          |
| 1565                          | 3,194514342                       | 1804                          |
| 1351                          | 3,130655349                       | 1295                          |
| 1448                          | 3,160768562                       | 1244                          |
| 1745                          | 3,241795431                       | 1862                          |
| 1689                          | 3,22762965                        | 1548                          |
| 1265                          | 3,102090526                       | 1247                          |
| 1686                          | 3,22685757                        | 1571                          |
| 1619                          | 3,209246849                       | 1925                          |
| 1614                          | 3,20790353                        | 1352                          |
| 1602                          | 3,204662512                       | 1456                          |
| 2100                          | 3,322219295                       | 1719                          |
| 1809                          | 3,257438567                       | 1904                          |
| 1663                          | 3,220892249                       | 1375                          |
| 2140                          | 3,330413773                       | 2284                          |
| 1609                          | 3,206556044                       | 1559                          |
| 1379                          | 3,139564266                       | 1585                          |
| 1999                          | 3,300812794                       | 1831                          |
| 1387                          | 3,142076461                       | 1463                          |
| 1659                          | 3,219846386                       | 1880                          |
| 1113                          | 3,046495164                       | 2172                          |
| 1422                          | 3,152899596                       | 1616                          |
| 1333                          | 3,124830149                       | 1580                          |
| 1652                          | 3,218010043                       | 1332                          |
| 1585                          | 3,200029267                       | 1696                          |
| 2002                          | 3,301464073                       | 1598                          |
| 1932                          | 3,286007122                       | 1895                          |
| 1778                          | 3,249931757                       | 1524                          |
| 1729                          | 3,237794993                       | 1912                          |

| LOG Ave Rt of All Correct Resp. b | Grey Mistakes.a | Grey Mistakes.b | Grey Missed.a |
|-----------------------------------|-----------------|-----------------|---------------|
| 3,252610341                       | 1               | 7               | 4             |
| 3,218797998                       | 2               | 3               | 1             |
| 3,258876629                       | 0               | 4               | 8             |
| 3,236033147                       | 2               | 1               | 3             |
| 3,164947373                       | 1               | 1               | 7             |
| 3,131618664                       | 2               | 1               | 3             |
| 3,200850498                       | 0               | 0               | 1             |
| 3,192846115                       | 4               | 0               | 1             |
| 3,247482261                       | 0               | 2               | 2             |
| 3,152899596                       | 1               | 0               | 1             |
| 3,078456818                       | 0               | 0               | 0             |
| 3,187802639                       | 0               | 0               | 0             |
| 3,163459552                       | 2               | 0               | 0             |
| 3,220892249                       | 0               | 0               | 0             |
| 3,340444115                       | 1               | 3               | 0             |
| 3,141449773                       | 2               | 0               | 1             |
| 3,148294097                       | 0               | 1               | 5             |
| 3,256236533                       | 1               | 6               | 0             |
| 3,112269768                       | 0               | 0               | 1             |
| 3,09482038                        | 2               | 1               | 1             |
| 3,269979677                       | 4               | 0               | 3             |
| 3,189770956                       | 0               | 0               | 0             |
| 3,095866453                       | 0               | 0               | 0             |
| 3,196176185                       | 3               | 0               | 0             |
| 3,284430734                       | 0               | 2               | 4             |
| 3,130976692                       | 1               | 0               | 0             |
| 3,163161375                       | 2               | 0               | 0             |
| 3,235275877                       | 2               | 1               | 1             |
| 3,279666944                       | 3               | 0               | 2             |
| 3,138302698                       | 3               | 1               | 1             |
| 3,3586961                         | 0               | 2               | 7             |
| 3,192846115                       | 0               | 0               | 0             |
| 3,200029267                       | 3               | 4               | 2             |
| 3,262688344                       | 1               | 1               | 7             |
| 3,165244326                       | 0               | 0               | 0             |
| 3,274157849                       | 0               | 1               | 2             |
| 3,336859821                       | 0               | 1               | 8             |
| 3,208441356                       | 6               | 0               | 0             |
| 3,198657087                       | 6               | 0               | 0             |
| 3,124504225                       | 0               | 0               | 0             |
| 3,229425848                       | 0               | 0               | 0             |
| 3,203576775                       | 1               | 3               | 1             |
| 3,277609214                       | 0               | 0               | 1             |
| 3,182984967                       | 4               | 2               | 2             |
| 3,281487888                       | 0               | 1               | 1             |

| Grey Missed.b | Grey Correct.a | Grey Correct.b | % of Correct Grey.a | % of Correct Grey. A +1 |
|---------------|----------------|----------------|---------------------|-------------------------|
| 0             | 3              | 1              | 37,5                | 38,5                    |
| 0             | 5              | 5              | 62,5                | 63,5                    |
| 1             | 0              | 3              | 0                   | 1                       |
| 1             | 3              | 6              | 37,5                | 38,5                    |
| 0             | 0              | 7              | 0                   | 1                       |
| 0             | 3              | 7              | 37,5                | 38,5                    |
| 0             | 7              | 8              | 87,5                | 88,5                    |
| 0             | 3              | 8              | 37,5                | 38,5                    |
| 2             | 6              | 4              | 75                  | 76                      |
| 0             | 6              | 8              | 75                  | 76                      |
| 0             | 8              | 8              | 100                 | 101                     |
| 0             | 8              | 8              | 100                 | 101                     |
| 0             | 6              | 8              | 75                  | 76                      |
| 0             | 8              | 8              | 100                 | 101                     |
| 2             | 7              | 3              | 87,5                | 88,5                    |
| 0             | 5              | 8              | 62,5                | 63,5                    |
| 0             | 3              | 7              | 37,5                | 38,5                    |
| 0             | 7              | 2              | 87,5                | 88,5                    |
| 0             | 7              | 8              | 87,5                | 88,5                    |
| 1             | 5              | 6              | 62,5                | 63,5                    |
| 2             | 1              | 6              | 12,5                | 13,5                    |
| 0             | 8              | 8              | 100                 | 101                     |
| 0             | 8              | 8              | 100                 | 101                     |
| 3             | 5              | 5              | 62,5                | 63,5                    |
| 2             | 4              | 4              | 50                  | 51                      |
| 0             | 7              | 8              | 87,5                | 88,5                    |
| 0             | 6              | 8              | 75                  | 76                      |
| 0             | 5              | 7              | 62,5                | 63,5                    |
| 8             | 3              | 0              | 37,5                | 38,5                    |
| 0             | 4              | 7              | 50                  | 51                      |
| 2             | 1              | 4              | 12,5                | 13,5                    |
| 0             | 8              | 8              | 100                 | 101                     |
| 1             | 3              | 3              | 37,5                | 38,5                    |
| 5             | 0              | 2              | 0                   | 1                       |
| 0             | 8              | 8              | 100                 | 101                     |
| 0             | 6              | 7              | 75                  | 76                      |
| 3             | 0              | 4              | 0                   | 1                       |
| 0             | 2              | 8              | 25                  | 26                      |
| 0             | 2              | 8              | 25                  | 26                      |
| 1             | 8              | 7              | 100                 | 101                     |
| 0             | 8              | 8              | 100                 | 101                     |
| 0             | 6              | 5              | 75                  | 76                      |
| 0             | 7              | 8              | 87,5                | 88,5                    |
| 0             | 2              | 6              | 25                  | 26                      |
| 0             | 7              | 7              | 87,5                | 88,5                    |

| LOG % of Correct Grey. A +1 | % of Correct Grey.b | % of Correct Grey.b +1 |
|-----------------------------|---------------------|------------------------|
| 1,58546073                  | 12,5                | 13,5                   |
| 1,802773725                 | 62,5                | 63,5                   |
| 0                           | 37,5                | 38,5                   |
| 1,58546073                  | 75                  | 76                     |
| 0                           | 87,5                | 88,5                   |
| 1,58546073                  | 87,5                | 88,5                   |
| 1,946943271                 | 100                 | 101                    |
| 1,58546073                  | 100                 | 101                    |
| 1,880813592                 | 50                  | 51                     |
| 1,880813592                 | 100                 | 101                    |
| 2,004321374                 | 100                 | 101                    |
| 2,004321374                 | 100                 | 101                    |
| 1,880813592                 | 100                 | 101                    |
| 2,004321374                 | 100                 | 101                    |
| 1,946943271                 | 37,5                | 38,5                   |
| 1,802773725                 | 100                 | 101                    |
| 1,58546073                  | 87,5                | 88,5                   |
| 1,946943271                 | 25                  | 26                     |
| 1,946943271                 | 100                 | 101                    |
| 1,802773725                 | 75                  | 76                     |
| 1,130333768                 | 75                  | 76                     |
| 2,004321374                 | 100                 | 101                    |
| 2,004321374                 | 100                 | 101                    |
| 1,802773725                 | 62,5                | 63,5                   |
| 1,707570176                 | 50                  | 51                     |
| 1,946943271                 | 100                 | 101                    |
| 1,880813592                 | 100                 | 101                    |
| 1,802773725                 | 87,5                | 88,5                   |
| 1,58546073                  | 0                   | 1                      |
| 1,707570176                 | 87,5                | 88,5                   |
| 1,130333768                 | 50                  | 51                     |
| 2,004321374                 | 100                 | 101                    |
| 1,58546073                  | 37,5                | 38,5                   |
| 0                           | 25                  | 26                     |
| 2,004321374                 | 100                 | 101                    |
| 1,880813592                 | 87,5                | 88,5                   |
| 0                           | 50                  | 51                     |
| 1,414973348                 | 100                 | 101                    |
| 1,414973348                 | 100                 | 101                    |
| 2,004321374                 | 87,5                | 88,5                   |
| 2,004321374                 | 100                 | 101                    |
| 1,880813592                 | 62,5                | 63,5                   |
| 1,946943271                 | 100                 | 101                    |
| 1,414973348                 | 75                  | 76                     |
| 1,946943271                 | 87,5                | 88,5                   |

## LOG % of Correct Grey. b +1

## Ave Rt of Correct Grey (NEUTRAL) Words.a

|             |      |
|-------------|------|
| 1,130333768 | 1793 |
| 1,802773725 | 2236 |
| 1,58546073  | 0    |
| 1,880813592 | 1657 |
| 1,946943271 | 0    |
| 1,946943271 | 1385 |
| 2,004321374 | 2187 |
| 2,004321374 | 2173 |
| 1,707570176 | 2334 |
| 2,004321374 | 1827 |
| 2,004321374 | 1877 |
| 2,004321374 | 2096 |
| 2,004321374 | 2034 |
| 2,004321374 | 1729 |
| 1,58546073  | 1678 |
| 2,004321374 | 1697 |
| 1,946943271 | 1575 |
| 1,414973348 | 1536 |
| 2,004321374 | 1678 |
| 1,880813592 | 1880 |
| 1,880813592 | 2603 |
| 2,004321374 | 1725 |
| 2,004321374 | 1238 |
| 1,802773725 | 1803 |
| 1,707570176 | 1853 |
| 2,004321374 | 1752 |
| 2,004321374 | 1728 |
| 1,946943271 | 2288 |
| 0           | 2080 |
| 1,946943271 | 2356 |
| 1,707570176 | 1464 |
| 2,004321374 | 1753 |
| 1,58546073  | 1792 |
| 1,414973348 | 0    |
| 2,004321374 | 1557 |
| 1,946943271 | 2098 |
| 1,707570176 | 0    |
| 2,004321374 | 1447 |
| 2,004321374 | 1159 |
| 1,946943271 | 2155 |
| 2,004321374 | 1688 |
| 1,802773725 | 2140 |
| 2,004321374 | 1854 |
| 1,880813592 | 2823 |
| 1,946943271 | 2127 |



| Ave Rt of Correct Grey (NEUTRAL) Words.a +1 | LOG Ave Rt of Correct Grey (NEUTRAL) Words.a +1 |
|---------------------------------------------|-------------------------------------------------|
| 1794                                        | 3,253822439                                     |
| 2237                                        | 3,349665984                                     |
| 1                                           | 0                                               |
| 1658                                        | 3,219584526                                     |
| 1                                           | 0                                               |
| 1386                                        | 3,14176323                                      |
| 2188                                        | 3,340047318                                     |
| 2174                                        | 3,33725954                                      |
| 2335                                        | 3,368286885                                     |
| 1828                                        | 3,261976191                                     |
| 1878                                        | 3,273695588                                     |
| 2097                                        | 3,32159843                                      |
| 2035                                        | 3,308564414                                     |
| 1730                                        | 3,238046103                                     |
| 1679                                        | 3,225050696                                     |
| 1698                                        | 3,229937686                                     |
| 1576                                        | 3,197556213                                     |
| 1537                                        | 3,186673867                                     |
| 1679                                        | 3,225050696                                     |
| 1881                                        | 3,274388796                                     |
| 2604                                        | 3,41564098                                      |
| 1726                                        | 3,237040791                                     |
| 1239                                        | 3,093071306                                     |
| 1804                                        | 3,256236533                                     |
| 1854                                        | 3,26810973                                      |
| 1753                                        | 3,243781916                                     |
| 1729                                        | 3,237794993                                     |
| 2289                                        | 3,359645793                                     |
| 2081                                        | 3,31827208                                      |
| 2357                                        | 3,372359583                                     |
| 1465                                        | 3,165837625                                     |
| 1754                                        | 3,244029589                                     |
| 1793                                        | 3,25358029                                      |
| 1                                           | 0                                               |
| 1558                                        | 3,192567453                                     |
| 2099                                        | 3,322012439                                     |
| 1                                           | 0                                               |
| 1448                                        | 3,160768562                                     |
| 1160                                        | 3,064457989                                     |
| 2156                                        | 3,333648757                                     |
| 1689                                        | 3,22762965                                      |
| 2141                                        | 3,330616667                                     |
| 1855                                        | 3,268343914                                     |
| 2824                                        | 3,450864692                                     |
| 2128                                        | 3,327971624                                     |

Ave Rt of Correct Grey (NEUTRAL) Words.b

Ave Rt of Correct Grey (NEUTRAL) Words.b +1

|      |      |
|------|------|
| 2087 | 2088 |
| 2101 | 2102 |
| 2456 | 2457 |
| 2140 | 2141 |
| 1692 | 1693 |
| 1649 | 1650 |
| 1618 | 1619 |
| 1816 | 1817 |
| 1489 | 1490 |
| 1677 | 1678 |
| 1451 | 1452 |
| 1616 | 1617 |
| 1847 | 1848 |
| 1793 | 1794 |
| 2261 | 2262 |
| 1462 | 1463 |
| 1533 | 1534 |
| 1512 | 1513 |
| 1556 | 1557 |
| 1430 | 1431 |
| 2167 | 2168 |
| 1803 | 1804 |
| 1222 | 1223 |
| 1859 | 1860 |
| 1524 | 1525 |
| 1404 | 1405 |
| 1651 | 1652 |
| 1754 | 1755 |
| 0    | 1    |
| 1768 | 1769 |
| 2296 | 2297 |
| 1609 | 1610 |
| 2148 | 2149 |
| 2552 | 2553 |
| 1469 | 1470 |
| 2035 | 2036 |
| 2178 | 2179 |
| 1621 | 1622 |
| 1640 | 1641 |
| 1545 | 1546 |
| 1992 | 1993 |
| 1730 | 1731 |
| 1755 | 1756 |
| 1713 | 1714 |
| 2059 | 2060 |

LOG Ave Rt of Correct Grey (NEUTRAL) Words.b +1

3,319730494  
3,322632712  
3,390405156  
3,330616667  
3,228656958  
3,217483944  
3,209246849  
3,259354927  
3,173186268  
3,224791956  
3,161966616  
3,20871002  
3,266701967  
3,253822439  
3,354492601  
3,165244326  
3,18582536  
3,179838928  
3,192288613  
3,155639634  
3,336059278  
3,256236533  
3,087426457  
3,269512944  
3,183269844  
3,147676324  
3,218010043  
3,244277121  
0  
3,247727833  
3,361160995  
3,206825876  
3,332236415  
3,407050815  
3,167317335  
3,308777774  
3,33825723  
3,21005085  
3,215108581  
3,18920949  
3,299507299  
3,238297068  
3,244524512  
3,234010818  
3,31386722

No. of Correct Colour Word (INCONGRUENT) Responses.a

- 11
- 16
- 12
- 12
- 17
- 13
- 16
- 18
- 16
- 19
- 23
- 18
- 24
- 24
- 3
- 15
- 17
- 2
- 21
- 18
- 18
- 20
- 24
- 7
- 12
- 23
- 21
- 18
- 18
- 22
- 10
- 23
- 16
- 14
- 24
- 21
- 14
- 14
- 23
- 21
- 23
- 10
- 12
- 15
- 14

No. of Correct Colour Word (INCONGRUENT) Responses.b

15  
16  
11  
17  
20  
24  
23  
24  
20  
19  
23  
24  
24  
23  
10  
22  
23  
19  
24  
21  
20  
24  
23  
10  
13  
23  
24  
23  
5  
23  
11  
20  
21  
16  
24  
14  
10  
24  
16  
22  
23  
20  
18  
6  
9

| % of Correct Colour Words (INCONGRUENT) a | LOG % of Correct Colour Words (INCONGRUENT) a |
|-------------------------------------------|-----------------------------------------------|
| 45,83333333                               | 1,661181443                                   |
| 66,66666667                               | 1,823908741                                   |
| 50                                        | 1,698970004                                   |
| 50                                        | 1,698970004                                   |
| 70,83333333                               | 1,85023768                                    |
| 54,16666667                               | 1,733732111                                   |
| 66,66666667                               | 1,823908741                                   |
| 75                                        | 1,875061263                                   |
| 66,66666667                               | 1,823908741                                   |
| 79,16666667                               | 1,898542359                                   |
| 95,83333333                               | 1,981516594                                   |
| 75                                        | 1,875061263                                   |
| 100                                       | 2                                             |
| 100                                       | 2                                             |
| 12,5                                      | 1,096910013                                   |
| 62,5                                      | 1,795880017                                   |
| 70,83333333                               | 1,85023768                                    |
| 8,333333333                               | 0,920818754                                   |
| 87,5                                      | 1,942008053                                   |
| 75                                        | 1,875061263                                   |
| 75                                        | 1,875061263                                   |
| 83,33333333                               | 1,920818754                                   |
| 100                                       | 2                                             |
| 29,16666667                               | 1,464886798                                   |
| 50                                        | 1,698970004                                   |
| 95,83333333                               | 1,981516594                                   |
| 87,5                                      | 1,942008053                                   |
| 75                                        | 1,875061263                                   |
| 75                                        | 1,875061263                                   |
| 91,66666667                               | 1,962211439                                   |
| 41,66666667                               | 1,619788758                                   |
| 95,83333333                               | 1,981516594                                   |
| 66,66666667                               | 1,823908741                                   |
| 58,33333333                               | 1,765916794                                   |
| 100                                       | 2                                             |
| 87,5                                      | 1,942008053                                   |
| 58,33333333                               | 1,765916794                                   |
| 58,33333333                               | 1,765916794                                   |
| 95,83333333                               | 1,981516594                                   |
| 87,5                                      | 1,942008053                                   |
| 95,83333333                               | 1,981516594                                   |
| 41,66666667                               | 1,619788758                                   |
| 50                                        | 1,698970004                                   |
| 62,5                                      | 1,795880017                                   |
| 58,33333333                               | 1,765916794                                   |

% of Correct Colour Words (INCONGRUENT) b

62,5  
66,6666667  
45,83333333  
70,83333333  
83,33333333  
100  
95,83333333  
100  
83,33333333  
79,16666667  
95,83333333  
100  
100  
95,83333333  
41,66666667  
91,66666667  
95,83333333  
79,16666667  
100  
87,5  
83,33333333  
100  
95,83333333  
41,66666667  
54,16666667  
95,83333333  
100  
95,83333333  
20,83333333  
95,83333333  
45,83333333  
83,33333333  
87,5  
66,66666667  
100  
58,33333333  
41,66666667  
100  
66,66666667  
91,66666667  
95,83333333  
83,33333333  
75  
25  
37,5

LOG % of Correct Colour Words (INCONGRUENT) b

1,795880017  
1,823908741  
1,661181443  
1,85023768  
1,920818754  
2  
1,981516594  
2  
1,920818754  
1,898542359  
1,981516594  
2  
2  
1,981516594  
1,619788758  
1,962211439  
1,981516594  
1,898542359  
2  
1,942008053  
1,920818754  
2  
1,981516594  
1,619788758  
1,733732111  
1,981516594  
2  
1,981516594  
1,318758763  
1,981516594  
1,661181443  
1,920818754  
1,942008053  
1,823908741  
2  
1,765916794  
1,619788758  
2  
1,823908741  
1,962211439  
1,981516594  
1,920818754  
1,875061263  
1,397940009  
1,574031268



Ave Rt of Correct Colour Word (INCONGRUENT) Responses a

2215  
1721  
1965  
2134  
1622  
1366  
1774  
1349  
1903  
1484  
1626  
1833  
1470  
1542  
1959  
1618  
1504  
1668  
1242  
1329  
1697  
1675  
1274  
1603  
1540  
1572  
1567  
2048  
1764  
1537  
2208  
1558  
1301  
1999  
1330  
1534  
1113  
1419  
1348  
1461  
1549  
1919  
1977  
1639  
1530

LOG Ave Rt of Correct Colour Word (INCONGRUENT) Responses a

3,345373731  
3,23578087  
3,293362555  
3,329194415  
3,21005085  
3,135450699  
3,248953615  
3,13001195  
3,279438788  
3,171433901  
3,211120541  
3,263162465  
3,167317335  
3,188084374  
3,292034436  
3,208978517  
3,177247836  
3,222196046  
3,094121596  
3,123524981  
3,229681842  
3,224014811  
3,105169428  
3,204933522  
3,187520721  
3,196452542  
3,195068996  
3,311329952  
3,246498581  
3,186673867  
3,343999069  
3,192567453  
3,114277297  
3,300812794  
3,123851641  
3,18582536  
3,046495164  
3,151982395  
3,129689892  
3,164650216  
3,190051418  
3,283074975  
3,296006669  
3,214578954  
3,184691431

Ave Rt of Correct Colour Word (INCONGRUENT) Responses b

1769  
1516  
1640  
1574  
1381  
1267  
1577  
1474  
1824  
1315  
1110  
1517  
1327  
1618  
2169  
1357  
1369  
1835  
1209  
1191  
1771  
1463  
1256  
1426  
2048  
1334  
1391  
1709  
1904  
1256  
2280  
1538  
1504  
1741  
1461  
1802  
2170  
1614  
1550  
1264  
1593  
1565  
1957  
1335  
1797

LOG Ave Rt of Correct Colour Word (INCONGRUENT) Responses b

3,247727833  
3,180699201  
3,214843848  
3,197004728  
3,140193679  
3,102776615  
3,197831693  
3,168497484  
3,261024834  
3,118925753  
3,045322979  
3,180985581  
3,122870923  
3,208978517  
3,336259552  
3,132579848  
3,136403448  
3,263636069  
3,082426301  
3,075911761  
3,248218561  
3,165244326  
3,098989639  
3,154119526  
3,311329952  
3,12515583  
3,14332713  
3,232742063  
3,279666944  
3,098989639  
3,357934847  
3,186956335  
3,177247836  
3,240798771  
3,164650216  
3,255754787  
3,336459734  
3,20790353  
3,190331698  
3,101747074  
3,202215776  
3,194514342  
3,291590826  
3,125481266  
3,254548077

Ave Rt of Incorrect Colour Word (INCONGRUENT) Responses a

2398  
1223  
1573  
1787  
1679  
1289  
2130  
1753  
2112  
1786  
0  
2314  
0  
0  
1853  
1555  
1819  
1623  
1260  
1239  
1492  
1647  
0  
1475  
1571  
1848  
1227  
1287  
2070  
836  
2034  
1416  
1648  
1645  
0  
1873  
1235  
1207  
1265  
2057  
1421  
1750  
1749  
1762  
1761

Ave Rt of Incorrect Colour Word (INCONGRUENT) Responses a +1

2399  
1224  
1574  
1788  
1680  
1290  
2131  
1754  
2113  
1787  
1  
2315  
1  
1  
1854  
1556  
1820  
1624  
1261  
1240  
1493  
1648  
1  
1476  
1572  
1849  
1228  
1288  
2071  
837  
2035  
1417  
1649  
1646  
1  
1874  
1236  
1208  
1266  
2058  
1422  
1751  
1750  
1763  
1762

LOG Ave Rt of Incorrect Colour Word (INCONGRUENT) Responses a +1

3,380030248  
3,087781418  
3,197004728  
3,252367514  
3,225309282  
3,11058971  
3,32858345  
3,244029589  
3,324899497  
3,252124553  
0  
3,364550995  
0  
0  
3,26810973  
3,192009593  
3,260071388  
3,210586025  
3,100715087  
3,093421685  
3,174059808  
3,216957207  
0  
3,169086357  
3,196452542  
3,266936911  
3,089198367  
3,109915863  
3,316180099  
2,922725458  
3,308564414  
3,15136985  
3,217220656  
3,216429831  
0  
3,272769587  
3,092018471  
3,082066934  
3,102433706  
3,31344537  
3,152899596  
3,243286146  
3,243038049  
3,246252312  
3,246005904

Ave Rt of Incorrect Colour Word (INCONGRUENT) Responses b

1597  
1119  
1781  
1767  
1545  
0  
1321  
0  
1874  
1163  
1087  
0  
0  
1048  
2488  
1458  
0  
2134  
0  
1741  
1900  
0  
0  
2071  
1773  
1520  
0  
1587  
2078  
1322  
1534  
1558  
1740  
2203  
0  
2168  
2266  
0  
1822  
1772  
2698  
1626  
1961  
1600  
1993



Ave Rt of Incorrect Colour Word (INCONGRUENT) Responses b +1

1598

1120

1782

1768

1546

1

1322

1

1875

1164

1088

1

1

1049

2489

1459

1

2135

1

1742

1901

1

1

2072

1774

1521

1

1588

2079

1323

1535

1559

1741

2204

1

2169

2267

1

1823

1773

2699

1627

1962

1601

1994

LOG Ave Rt of Incorrect Colour Word (INCONGRUENT) Responses b +1

3,203576775  
3,049218023  
3,2509077  
3,247482261  
3,18920949  
0  
3,121231455  
0  
3,273001272  
3,06595298  
3,036628895  
0  
0  
3,020775488  
3,396024897  
3,164055292  
0  
3,329397879  
0  
3,241048151  
3,278982117  
0  
0  
3,316389751  
3,248953615  
3,182129214  
0  
3,200850498  
3,317854489  
3,121559844  
3,18610838  
3,192846115  
3,240798771  
3,34321159  
0  
3,336259552  
3,35545152  
0  
3,260786669  
3,248708736  
3,431202885  
3,211387553  
3,292699003  
3,204391332  
3,299725154

Ave Rt of Incorrect Grey Word (NEUTRAL) Responses a

699  
1182  
0  
2802  
1849  
1826  
0  
2506  
0  
1073  
0  
0  
1487  
0  
1878  
1619  
0  
1633  
0  
1419  
1678  
0  
0  
1093  
0  
1284  
1178  
673  
2676  
1261  
0  
0  
1766  
830  
0  
0  
0  
1292  
1183  
0  
0  
2348  
0  
1454  
0

Ave Rt of Incorrect Grey Word (NEUTRAL) Responses a +1

700  
1183  
1  
2803  
1850  
1827  
1  
2507  
1  
1074  
1  
1  
1488  
1  
1879  
1620  
1  
1634  
1  
1420  
1679  
1  
1  
1094  
1  
1285  
1179  
674  
2677  
1262  
1  
1  
1767  
831  
1  
1  
1  
1293  
1184  
1  
1  
2349  
1  
1455  
1

LOG Ave Rt of Incorrect Grey Word (NEUTRAL) Responses a +1

2,84509804  
3,072984745  
0  
3,447623098  
3,267171728  
3,261738547  
0  
3,399154334  
0  
3,031004281  
0  
0  
3,172602931  
0  
3,27392678  
3,209515015  
0  
3,213252052  
0  
3,152288344  
3,225050696  
0  
0  
3,039017322  
0  
3,108903128  
3,071513805  
2,828659897  
3,427648371  
3,101059355  
0  
0  
3,24723655  
2,919601024  
0  
0  
0  
3,111598525  
3,073351702  
0  
0  
3,370883017  
0  
3,162862993  
0

Ave Rt of Incorrect Grey Word (NEUTRAL) Responses b

2094

1636

1951

2551

1270

1009

0

0

2235

0

0

0

0

0

2047

0

2026

1881

0

1085

0

0

0

0

2534

0

0

1433

0

930

2529

0

1442

2018

0

1353

1992

0

0

0

0

1949

0

1570

862

Ave Rt of Incorrect Grey Word (NEUTRAL) Responses b +1

2095  
1637  
1952  
2552  
1271  
1010  
1  
1  
2236  
1  
1  
1  
1  
1  
2048  
1  
2027  
1882  
1  
1086  
1  
1  
1  
1  
2535  
1  
1  
1434  
1  
931  
2530  
1  
1443  
2019  
1  
1354  
1993  
1  
1  
1  
1  
1950  
1  
1571  
863

| LOG Ave Rt of Incorrect Grey Word (NEUTRAL) Responses b +1 | 0Back.Score a | LOG 0 Back.Scorea |
|------------------------------------------------------------|---------------|-------------------|
| 3,321184027                                                | 98            | 1,991226076       |
| 3,214048679                                                | 98            | 1,991226076       |
| 3,290479813                                                | 97            | 1,986771734       |
| 3,40688067                                                 | 99            | 1,995635195       |
| 3,104145551                                                | 96            | 1,982271233       |
| 3,004321374                                                | 98            | 1,991226076       |
| 0                                                          | 98            | 1,991226076       |
| 0                                                          | 97            | 1,986771734       |
| 3,349471799                                                | 94            | 1,973127854       |
| 0                                                          | 98            | 1,991226076       |
| 0                                                          | 99            | 1,995635195       |
| 0                                                          | 96            | 1,982271233       |
| 0                                                          | 99            | 1,995635195       |
| 0                                                          | 97            | 1,986771734       |
| 3,311329952                                                | 95            | 1,977723605       |
| 0                                                          | 100           | 2                 |
| 3,306853749                                                | 95            | 1,977723605       |
| 3,274619619                                                | 94            | 1,973127854       |
| 0                                                          | 98            | 1,991226076       |
| 3,035829825                                                | 98            | 1,991226076       |
| 0                                                          | 98            | 1,991226076       |
| 0                                                          | 98            | 1,991226076       |
| 0                                                          | 98            | 1,991226076       |
| 0                                                          | 92            | 1,963787827       |
| 3,403977964                                                | 92            | 1,963787827       |
| 0                                                          | 99            | 1,995635195       |
| 0                                                          | 97            | 1,986771734       |
| 3,156549151                                                | 97            | 1,986771734       |
| 0                                                          | 94            | 1,973127854       |
| 2,968949681                                                | 100           | 2                 |
| 3,403120521                                                | 97            | 1,986771734       |
| 0                                                          | 99            | 1,995635195       |
| 3,159266331                                                | 94            | 1,973127854       |
| 3,305136319                                                | 88            | 1,944482672       |
| 0                                                          | 100           | 2                 |
| 3,131618664                                                | 96            | 1,982271233       |
| 3,299507299                                                | 96            | 1,982271233       |
| 0                                                          | 97            | 1,986771734       |
| 0                                                          | 99            | 1,995635195       |
| 0                                                          | 100           | 2                 |
| 0                                                          | 98            | 1,991226076       |
| 3,290034611                                                | 91            | 1,959041392       |
| 0                                                          | 98            | 1,991226076       |
| 3,196176185                                                | 99            | 1,995635195       |
| 2,936010796                                                | 98            | 1,991226076       |



| OBack.Score b | LOG 0 Back.Scoreb | OBack.Found.Targ a | OBack.Found.Targ b | OBack.Missed.Targ a |
|---------------|-------------------|--------------------|--------------------|---------------------|
| 98            | 1,991226076       | 134                | 134                | 1                   |
| 100           | 2                 | 133                | 135                | 2                   |
| 99            | 1,995635195       | 133                | 135                | 2                   |
| 100           | 2                 | 135                | 135                | 0                   |
| 98            | 1,991226076       | 131                | 133                | 4                   |
| 99            | 1,995635195       | 134                | 135                | 1                   |
| 99            | 1,995635195       | 134                | 134                | 1                   |
| 99            | 1,995635195       | 131                | 134                | 4                   |
| 98            | 1,991226076       | 133                | 134                | 2                   |
| 100           | 2                 | 135                | 135                | 0                   |
| 100           | 2                 | 135                | 135                | 0                   |
| 97            | 1,986771734       | 133                | 132                | 3                   |
| 98            | 1,991226076       | 135                | 135                | 0                   |
| 99            | 1,995635195       | 134                | 134                | 1                   |
| 99            | 1,995635195       | 131                | 134                | 4                   |
| 100           | 2                 | 136                | 135                | 0                   |
| 99            | 1,995635195       | 130                | 135                | 5                   |
| 95            | 1,977723605       | 128                | 130                | 7                   |
| 99            | 1,995635195       | 133                | 134                | 2                   |
| 100           | 2                 | 134                | 135                | 1                   |
| 98            | 1,991226076       | 134                | 134                | 1                   |
| 100           | 2                 | 133                | 135                | 2                   |
| 98            | 1,991226076       | 133                | 134                | 2                   |
| 98            | 1,991226076       | 126                | 134                | 9                   |
| 96            | 1,982271233       | 127                | 131                | 8                   |
| 100           | 2                 | 135                | 135                | 0                   |
| 98            | 1,991226076       | 132                | 134                | 3                   |
| 97            | 1,986771734       | 132                | 132                | 3                   |
| 98            | 1,991226076       | 130                | 134                | 5                   |
| 100           | 2                 | 135                | 135                | 0                   |
| 92            | 1,963787827       | 134                | 126                | 1                   |
| 99            | 1,995635195       | 134                | 135                | 1                   |
| 97            | 1,986771734       | 129                | 132                | 6                   |
| 96            | 1,982271233       | 121                | 132                | 14                  |
| 98            | 1,991226076       | 135                | 134                | 0                   |
| 96            | 1,982271233       | 131                | 131                | 4                   |
| 99            | 1,995635195       | 132                | 134                | 4                   |
| 99            | 1,995635195       | 133                | 135                | 2                   |
| 99            | 1,995635195       | 135                | 135                | 0                   |
| 99            | 1,995635195       | 135                | 134                | 0                   |
| 95            | 1,977723605       | 134                | 132                | 1                   |
| 93            | 1,968482949       | 126                | 130                | 9                   |
| 95            | 1,977723605       | 133                | 131                | 2                   |
| 100           | 2                 | 135                | 135                | 0                   |
| 98            | 1,991226076       | 134                | 134                | 1                   |

| OBack.Missed.Targ b | OBack.Wrong.Targ a | OBack.Wrong.Targ b | OBack.Total.Targ a |
|---------------------|--------------------|--------------------|--------------------|
| 1                   | 1                  | 1                  | 135                |
| 0                   | 0                  | 0                  | 135                |
| 0                   | 4                  | 1                  | 135                |
| 0                   | 1                  | 0                  | 135                |
| 2                   | 1                  | 0                  | 135                |
| 0                   | 1                  | 2                  | 135                |
| 1                   | 2                  | 0                  | 135                |
| 1                   | 0                  | 0                  | 135                |
| 1                   | 12                 | 2                  | 135                |
| 0                   | 5                  | 0                  | 135                |
| 0                   | 1                  | 0                  | 135                |
| 3                   | 3                  | 1                  | 136                |
| 0                   | 2                  | 3                  | 135                |
| 1                   | 6                  | 0                  | 135                |
| 1                   | 3                  | 0                  | 135                |
| 0                   | 0                  | 0                  | 136                |
| 0                   | 1                  | 1                  | 135                |
| 6                   | 2                  | 0                  | 135                |
| 1                   | 0                  | 0                  | 135                |
| 0                   | 1                  | 0                  | 135                |
| 1                   | 1                  | 2                  | 135                |
| 0                   | 0                  | 0                  | 135                |
| 1                   | 0                  | 1                  | 135                |
| 1                   | 1                  | 1                  | 135                |
| 4                   | 3                  | 2                  | 135                |
| 0                   | 1                  | 0                  | 135                |
| 1                   | 1                  | 1                  | 135                |
| 3                   | 0                  | 1                  | 135                |
| 1                   | 4                  | 1                  | 135                |
| 0                   | 0                  | 0                  | 135                |
| 9                   | 4                  | 3                  | 135                |
| 0                   | 0                  | 1                  | 135                |
| 3                   | 2                  | 0                  | 135                |
| 3                   | 4                  | 4                  | 135                |
| 1                   | 0                  | 1                  | 135                |
| 5                   | 1                  | 0                  | 135                |
| 1                   | 2                  | 0                  | 136                |
| 0                   | 2                  | 1                  | 135                |
| 0                   | 2                  | 2                  | 135                |
| 1                   | 0                  | 0                  | 135                |
| 5                   | 1                  | 1                  | 135                |
| 5                   | 4                  | 7                  | 135                |
| 4                   | 1                  | 3                  | 135                |
| 0                   | 1                  | 0                  | 135                |
| 1                   | 3                  | 3                  | 135                |

| OBack.Total.Targ b | 1Back.Score a | LOG 1 Back.Score a | 1Back.Score b | LOG 1 Back.Score b |
|--------------------|---------------|--------------------|---------------|--------------------|
| 135                | 95            | 1,977723605        | 98            | 1,991226076        |
| 135                | 97            | 1,986771734        | 100           | 2                  |
| 135                | 92            | 1,963787827        | 90            | 1,954242509        |
| 135                | 86            | 1,934498451        | 98            | 1,991226076        |
| 135                | 90            | 1,954242509        | 88            | 1,944482672        |
| 135                | 100           | 2                  | 98            | 1,991226076        |
| 135                | 99            | 1,995635195        | 97            | 1,986771734        |
| 135                | 98            | 1,991226076        | 98            | 1,991226076        |
| 135                | 95            | 1,977723605        | 98            | 1,991226076        |
| 135                | 97            | 1,986771734        | 94            | 1,973127854        |
| 135                | 98            | 1,991226076        | 95            | 1,977723605        |
| 135                | 97            | 1,986771734        | 95            | 1,977723605        |
| 135                | 98            | 1,991226076        | 97            | 1,986771734        |
| 135                | 95            | 1,977723605        | 95            | 1,977723605        |
| 135                | 94            | 1,973127854        | 98            | 1,991226076        |
| 135                | 96            | 1,982271233        | 99            | 1,995635195        |
| 135                | 89            | 1,949390007        | 97            | 1,986771734        |
| 135                | 74            | 1,86923172         | 93            | 1,968482949        |
| 135                | 98            | 1,991226076        | 100           | 2                  |
| 135                | 93            | 1,968482949        | 98            | 1,991226076        |
| 135                | 92            | 1,963787827        | 95            | 1,977723605        |
| 135                | 97            | 1,986771734        | 97            | 1,986771734        |
| 135                | 98            | 1,991226076        | 97            | 1,986771734        |
| 135                | 100           | 2                  | 98            | 1,991226076        |
| 135                | 78            | 1,892094603        | 75            | 1,875061263        |
| 135                | 99            | 1,995635195        | 98            | 1,991226076        |
| 135                | 100           | 2                  | 100           | 2                  |
| 135                | 73            | 1,86332286         | 85            | 1,929418926        |
| 135                | 93            | 1,968482949        | 79            | 1,897627091        |
| 135                | 100           | 2                  | 97            | 1,986771734        |
| 135                | 93            | 1,968482949        | 90            | 1,954242509        |
| 135                | 100           | 2                  | 100           | 2                  |
| 135                | 93            | 1,968482949        | 93            | 1,968482949        |
| 135                | 82            | 1,913813852        | 100           | 2                  |
| 135                | 92            | 1,963787827        | 100           | 2                  |
| 136                | 82            | 1,913813852        | 84            | 1,924279286        |
| 135                | 90            | 1,954242509        | 92            | 1,963787827        |
| 135                | 95            | 1,977723605        | 98            | 1,991226076        |
| 135                | 97            | 1,986771734        | 96            | 1,982271233        |
| 135                | 96            | 1,982271233        | 100           | 2                  |
| 137                | 93            | 1,968482949        | 96            | 1,982271233        |
| 135                | 90            | 1,954242509        | 98            | 1,991226076        |
| 135                | 100           | 2                  | 100           | 2                  |
| 135                | 99            | 1,995635195        | 100           | 2                  |
| 135                | 99            | 1,995635195        | 96            | 1,982271233        |

| 1Back.Found.Targ a | 1Back.Found.Targ b | 1Back.Missed.Targ a | 1Back.Missed.Targ b |
|--------------------|--------------------|---------------------|---------------------|
| 60                 | 66                 | 3                   | 0                   |
| 69                 | 61                 | 0                   | 0                   |
| 63                 | 63                 | 4                   | 4                   |
| 57                 | 61                 | 8                   | 1                   |
| 56                 | 59                 | 5                   | 4                   |
| 62                 | 61                 | 0                   | 1                   |
| 60                 | 66                 | 0                   | 1                   |
| 60                 | 60                 | 1                   | 1                   |
| 58                 | 65                 | 2                   | 1                   |
| 62                 | 58                 | 1                   | 1                   |
| 62                 | 57                 | 0                   | 2                   |
| 63                 | 65                 | 1                   | 1                   |
| 64                 | 62                 | 1                   | 1                   |
| 59                 | 58                 | 2                   | 2                   |
| 58                 | 66                 | 2                   | 1                   |
| 62                 | 67                 | 2                   | 0                   |
| 58                 | 64                 | 4                   | 1                   |
| 48                 | 59                 | 15                  | 2                   |
| 64                 | 64                 | 1                   | 0                   |
| 62                 | 64                 | 2                   | 0                   |
| 56                 | 59                 | 4                   | 2                   |
| 67                 | 62                 | 1                   | 0                   |
| 63                 | 68                 | 0                   | 0                   |
| 62                 | 57                 | 0                   | 1                   |
| 51                 | 49                 | 10                  | 16                  |
| 64                 | 60                 | 0                   | 1                   |
| 57                 | 63                 | 0                   | 0                   |
| 48                 | 53                 | 15                  | 8                   |
| 61                 | 48                 | 1                   | 10                  |
| 67                 | 65                 | 0                   | 0                   |
| 63                 | 58                 | 3                   | 4                   |
| 65                 | 61                 | 0                   | 0                   |
| 57                 | 60                 | 2                   | 2                   |
| 54                 | 71                 | 10                  | 0                   |
| 57                 | 57                 | 3                   | 0                   |
| 53                 | 52                 | 10                  | 9                   |
| 58                 | 52                 | 5                   | 4                   |
| 60                 | 62                 | 2                   | 1                   |
| 60                 | 63                 | 1                   | 1                   |
| 64                 | 65                 | 1                   | 0                   |
| 58                 | 61                 | 3                   | 2                   |
| 58                 | 60                 | 5                   | 1                   |
| 66                 | 64                 | 0                   | 0                   |
| 61                 | 65                 | 0                   | 0                   |
| 60                 | 62                 | 0                   | 2                   |

| 1Back.Wrong.Targ a | 1Back.Wrong.Targ b | 1Back.Total.Targ a | 1Back.Total.Targ b | 2Back.Score a |
|--------------------|--------------------|--------------------|--------------------|---------------|
| 0                  | 2                  | 63                 | 66                 | 29            |
| 3                  | 0                  | 69                 | 61                 | 63            |
| 2                  | 5                  | 67                 | 67                 | 62            |
| 2                  | 0                  | 65                 | 62                 | 79            |
| 1                  | 6                  | 61                 | 63                 | 74            |
| 0                  | 0                  | 62                 | 62                 | 58            |
| 1                  | 2                  | 60                 | 67                 | 51            |
| 0                  | 0                  | 61                 | 61                 | 90            |
| 2                  | 0                  | 60                 | 66                 | 68            |
| 1                  | 4                  | 63                 | 59                 | 61            |
| 2                  | 1                  | 62                 | 59                 | 81            |
| 1                  | 4                  | 64                 | 66                 | 50            |
| 0                  | 1                  | 65                 | 63                 | 64            |
| 1                  | 2                  | 61                 | 60                 | 58            |
| 3                  | 0                  | 60                 | 67                 | 66            |
| 1                  | 1                  | 64                 | 67                 | 92            |
| 5                  | 1                  | 62                 | 65                 | 75            |
| 2                  | 4                  | 63                 | 61                 | 0             |
| 0                  | 0                  | 65                 | 64                 | 20            |
| 4                  | 2                  | 64                 | 64                 | 76            |
| 1                  | 2                  | 60                 | 61                 | 49            |
| 2                  | 3                  | 68                 | 62                 | 67            |
| 2                  | 4                  | 63                 | 68                 | 84            |
| 0                  | 0                  | 62                 | 58                 | 58            |
| 6                  | 0                  | 61                 | 65                 | 0             |
| 1                  | 0                  | 64                 | 61                 | 92            |
| 0                  | 0                  | 57                 | 63                 | 70            |
| 3                  | 2                  | 63                 | 61                 | 73            |
| 6                  | 4                  | 62                 | 58                 | 37            |
| 0                  | 3                  | 67                 | 65                 | 79            |
| 2                  | 4                  | 66                 | 62                 | 0             |
| 0                  | 0                  | 65                 | 61                 | 87            |
| 4                  | 4                  | 59                 | 62                 | 37            |
| 2                  | 0                  | 64                 | 71                 | 2             |
| 3                  | 0                  | 60                 | 57                 | 83            |
| 2                  | 1                  | 63                 | 61                 | 46            |
| 2                  | 0                  | 63                 | 56                 | 0             |
| 1                  | 0                  | 62                 | 63                 | 70            |
| 1                  | 3                  | 61                 | 64                 | 78            |
| 3                  | 0                  | 65                 | 65                 | 66            |
| 2                  | 1                  | 61                 | 63                 | 61            |
| 2                  | 0                  | 63                 | 61                 | 23            |
| 0                  | 0                  | 66                 | 64                 | 11            |
| 1                  | 0                  | 61                 | 65                 | 68            |
| 1                  | 1                  | 60                 | 64                 | 60            |

| 2Back.Score a +1 | LOG 2 Back.Score a | 2Back.Score b | 2Back.Score b +1 | LOG 2 Back.Score b |
|------------------|--------------------|---------------|------------------|--------------------|
| 30               | 1,477121255        | 50            | 51               | 1,707570176        |
| 64               | 1,806179974        | 64            | 65               | 1,812913357        |
| 63               | 1,799340549        | 78            | 79               | 1,897627091        |
| 80               | 1,903089987        | 72            | 73               | 1,86332286         |
| 75               | 1,875061263        | 64            | 65               | 1,812913357        |
| 59               | 1,770852012        | 62            | 63               | 1,799340549        |
| 52               | 1,716003344        | 76            | 77               | 1,886490725        |
| 91               | 1,959041392        | 96            | 97               | 1,986771734        |
| 69               | 1,838849091        | 74            | 75               | 1,875061263        |
| 62               | 1,792391689        | 91            | 92               | 1,963787827        |
| 82               | 1,913813852        | 85            | 86               | 1,934498451        |
| 51               | 1,707570176        | 90            | 91               | 1,959041392        |
| 65               | 1,812913357        | 88            | 89               | 1,949390007        |
| 59               | 1,770852012        | 74            | 75               | 1,875061263        |
| 67               | 1,826074803        | 82            | 83               | 1,919078092        |
| 93               | 1,968482949        | 79            | 80               | 1,903089987        |
| 76               | 1,880813592        | 83            | 84               | 1,924279286        |
| 1                | 0                  | 22            | 23               | 1,361727836        |
| 21               | 1,322219295        | 68            | 69               | 1,838849091        |
| 77               | 1,886490725        | 92            | 93               | 1,968482949        |
| 50               | 1,698970004        | 57            | 58               | 1,763427994        |
| 68               | 1,832508913        | 88            | 89               | 1,949390007        |
| 85               | 1,929418926        | 98            | 99               | 1,995635195        |
| 59               | 1,770852012        | 64            | 65               | 1,812913357        |
| 1                | 0                  | 60            | 61               | 1,785329835        |
| 93               | 1,968482949        | 87            | 88               | 1,944482672        |
| 71               | 1,851258349        | 94            | 95               | 1,977723605        |
| 74               | 1,86923172         | 89            | 90               | 1,954242509        |
| 38               | 1,579783597        | 83            | 84               | 1,924279286        |
| 80               | 1,903089987        | 85            | 86               | 1,934498451        |
| 1                | 0                  | 38            | 39               | 1,591064607        |
| 88               | 1,944482672        | 85            | 86               | 1,934498451        |
| 38               | 1,579783597        | 91            | 92               | 1,963787827        |
| 3                | 0,477121255        | 71            | 72               | 1,857332496        |
| 84               | 1,924279286        | 94            | 95               | 1,977723605        |
| 47               | 1,672097858        | 38            | 39               | 1,591064607        |
| 1                | 0                  | 95            | 96               | 1,982271233        |
| 71               | 1,851258349        | 45            | 46               | 1,662757832        |
| 79               | 1,897627091        | 90            | 91               | 1,959041392        |
| 67               | 1,826074803        | 71            | 72               | 1,857332496        |
| 62               | 1,792391689        | 78            | 79               | 1,897627091        |
| 24               | 1,380211242        | 48            | 49               | 1,69019608         |
| 12               | 1,079181246        | 51            | 52               | 1,716003344        |
| 69               | 1,838849091        | 62            | 63               | 1,799340549        |
| 61               | 1,785329835        | 68            | 69               | 1,838849091        |

| 2Back.Found.Targ a | 2Back.Found.Targ b | 2Back.Missed.Targ a | 2Back.Missed.Targ b |
|--------------------|--------------------|---------------------|---------------------|
| 35                 | 41                 | 19                  | 16                  |
| 51                 | 47                 | 9                   | 10                  |
| 37                 | 45                 | 14                  | 8                   |
| 49                 | 41                 | 9                   | 11                  |
| 45                 | 50                 | 8                   | 7                   |
| 44                 | 44                 | 13                  | 12                  |
| 35                 | 46                 | 18                  | 8                   |
| 51                 | 53                 | 4                   | 2                   |
| 45                 | 44                 | 13                  | 11                  |
| 44                 | 55                 | 7                   | 3                   |
| 47                 | 50                 | 9                   | 6                   |
| 38                 | 51                 | 14                  | 4                   |
| 44                 | 57                 | 12                  | 2                   |
| 38                 | 40                 | 17                  | 10                  |
| 44                 | 44                 | 15                  | 8                   |
| 52                 | 47                 | 4                   | 8                   |
| 43                 | 48                 | 11                  | 6                   |
| 27                 | 31                 | 28                  | 27                  |
| 43                 | 53                 | 10                  | 2                   |
| 48                 | 54                 | 9                   | 3                   |
| 36                 | 33                 | 20                  | 22                  |
| 38                 | 49                 | 18                  | 5                   |
| 56                 | 54                 | 3                   | 0                   |
| 42                 | 39                 | 15                  | 13                  |
| 18                 | 34                 | 37                  | 19                  |
| 52                 | 49                 | 2                   | 5                   |
| 41                 | 53                 | 15                  | 3                   |
| 46                 | 50                 | 9                   | 5                   |
| 26                 | 50                 | 27                  | 5                   |
| 49                 | 53                 | 4                   | 6                   |
| 4                  | 26                 | 48                  | 32                  |
| 57                 | 46                 | 1                   | 5                   |
| 25                 | 54                 | 29                  | 4                   |
| 27                 | 54                 | 27                  | 3                   |
| 49                 | 57                 | 7                   | 2                   |
| 38                 | 43                 | 18                  | 13                  |
| 48                 | 56                 | 10                  | 2                   |
| 41                 | 36                 | 12                  | 20                  |
| 51                 | 54                 | 8                   | 4                   |
| 46                 | 45                 | 10                  | 11                  |
| 43                 | 52                 | 13                  | 6                   |
| 42                 | 44                 | 13                  | 9                   |
| 23                 | 31                 | 33                  | 23                  |
| 49                 | 42                 | 6                   | 13                  |
| 40                 | 44                 | 16                  | 11                  |

| 2Back.Wrong.Targ a | 2Back.Wrong.Targ b | 2Back.Total.Targ a | 2Back.Total.Targ b | Clock.Draw a |
|--------------------|--------------------|--------------------|--------------------|--------------|
| 38                 | 25                 | 54                 | 57                 | 2            |
| 26                 | 20                 | 60                 | 57                 | 2            |
| 10                 | 7                  | 51                 | 53                 | 1            |
| 6                  | 7                  | 58                 | 52                 | 2            |
| 11                 | 27                 | 53                 | 57                 | 2            |
| 21                 | 18                 | 57                 | 56                 | 3            |
| 15                 | 9                  | 53                 | 54                 | 2            |
| 3                  | 0                  | 55                 | 55                 | 4            |
| 11                 | 6                  | 58                 | 55                 | 2            |
| 25                 | 4                  | 51                 | 58                 | 2            |
| 3                  | 4                  | 56                 | 56                 | 1            |
| 23                 | 3                  | 52                 | 55                 | 2            |
| 16                 | 10                 | 56                 | 59                 | 1            |
| 12                 | 6                  | 55                 | 50                 | 1            |
| 9                  | 2                  | 59                 | 52                 | 2            |
| 0                  | 7                  | 56                 | 55                 | 2            |
| 5                  | 6                  | 54                 | 54                 | 4            |
| 82                 | 36                 | 55                 | 58                 | 6            |
| 64                 | 31                 | 53                 | 55                 | 1            |
| 9                  | 2                  | 57                 | 57                 | 2            |
| 17                 | 3                  | 56                 | 55                 | 2            |
| 0                  | 2                  | 56                 | 54                 | 2            |
| 12                 | 2                  | 59                 | 54                 | 1            |
| 17                 | 11                 | 57                 | 52                 | 3            |
| 109                | 4                  | 55                 | 53                 | 3            |
| 4                  | 3                  | 54                 | 54                 | 3            |
| 3                  | 0                  | 56                 | 56                 | 4            |
| 11                 | 2                  | 55                 | 55                 | 1            |
| 12                 | 8                  | 53                 | 55                 | 3            |
| 14                 | 5                  | 53                 | 59                 | 1            |
| 27                 | 7                  | 52                 | 58                 | 3            |
| 13                 | 5                  | 5                  | 51                 | 1            |
| 9                  | 2                  | 54                 | 58                 | 6            |
| 51                 | 27                 | 54                 | 57                 | 4            |
| 4                  | 2                  | 56                 | 59                 | 2            |
| 24                 | 43                 | 56                 | 56                 | 2            |
| 181                | 1                  | 58                 | 58                 | 1            |
| 7                  | 21                 | 53                 | 56                 | 2            |
| 9                  | 3                  | 59                 | 58                 | 2            |
| 18                 | 10                 | 56                 | 56                 | 2            |
| 17                 | 13                 | 56                 | 58                 | 2            |
| 58                 | 37                 | 55                 | 53                 | 2            |
| 33                 | 6                  | 56                 | 54                 | 2            |
| 23                 | 15                 | 55                 | 55                 | 2            |
| 12                 | 13                 | 56                 | 55                 | 2            |



| Clock.Draw b | CLK Draw Difference (a-b) | MMSEa | MMSEb |
|--------------|---------------------------|-------|-------|
| 2            | 0                         | 19    | 23    |
| 2            | 0                         | 27    | 28    |
| 2            | -1                        | 22    | 29    |
| 1            | 1                         | 27    | 28    |
| 2            | 0                         | 24    | 25    |
| 1            | 2                         | 25    | 28    |
| 2            | 0                         | 25    | 28    |
| 1            | 3                         | 26    | 22    |
| 1            | 1                         | 26    | 29    |
| 2            | 0                         | 29    | 29    |
| 1            | 0                         | 28    | 30    |
| 1            | 1                         | 21    | 25    |
| 1            | 0                         | 23    | 26    |
| 2            | -1                        | 23    | 26    |
| 4            | -2                        | 21    | 29    |
| 2            | 0                         | 25    | 29    |
| 2            | 2                         | 25    | 28    |
| 4            | 2                         | 23    | 25    |
| 1            | 0                         | 26    | 28    |
| 1            | 1                         | 25    | 30    |
| 1            | 1                         | 22    | 28    |
| 2            | 0                         | 25    | 29    |
| 2            | -1                        | 30    | 29    |
| 2            | 1                         | 28    | 23    |
| 5            | -2                        | 24    | 24    |
| 2            | 1                         | 24    | 26    |
| 2            | 2                         | 25    | 28    |
| 1            | 0                         | 30    | 28    |
| 2            | 1                         | 25    | 22    |
| 1            | 0                         | 28    | 28    |
| 2            | 1                         | 23    | 22    |
| 1            | 0                         | 25    | 28    |
| 5            | 1                         | 20    | 20    |
| 3            | 1                         | 23    | 22    |
| 1            | 1                         | 26    | 27    |
| 2            | 0                         | 19    | 21    |
| 4            | -3                        | 26    | 25    |
| 2            | 0                         | 26    | 26    |
| 2            | 0                         | 26    | 29    |
| 3            | -1                        | 24    | 28    |
| 2            | 0                         | 24    | 26    |
| 1            | 1                         | 25    | 23    |
| 2            | 0                         | 25    | 27    |
| 2            | 0                         | 28    | 24    |
| 2            | 0                         | 25    | 27    |



Current Marital Status (Married=1; Single=2; Divorced=3; Widowed=4)

|  | School | Tertiary | Total |     |
|--|--------|----------|-------|-----|
|  | 3      | 9        | 0     | 9   |
|  | 4      | 7        | 0     | 7   |
|  | 4      | 7        | 0     | 7   |
|  | 4      | 10       | 0     | 10  |
|  | 4      | 8        | 0     | 8   |
|  | 3      | 12       | 5     | 17  |
|  | 4      | 12       | 2     | 14  |
|  | 1      | 10       | 3     | 13  |
|  | 3      | 12       | 3     | 15  |
|  | 4      | 12       | 0     | 12  |
|  | 4      | 12       | 2     | 14  |
|  | 3      | 7        | 0     | 7   |
|  | 1      | 10       | 0     | 10  |
|  | 1      | 8        | 0     | 8   |
|  | 4      | 12       | 1     | 13  |
|  | 4      | 11       | 0     | 11  |
|  | 2      | 7        | 0     | 7   |
|  | 4      | 7        | 0     | 7   |
|  | 1      | 8        | 0     | 8   |
|  | 2      | 10       | 4     | 14  |
|  | 4      | 5        | 0     | 5   |
|  | 4      | 5        | 0     | 5   |
|  | 4      | 11       | 0     | 11  |
|  | 2      | 9        | 0     | 9   |
|  | 3      | 9        | 0     | 9   |
|  | 4      | 8        | 0     | 8   |
|  | 3      | 9        | 3     | 12  |
|  | 4      | 12       | 4     | 16  |
|  | 1      | 11       | 0     | 11  |
|  | 1      | 10       | 0     | 10  |
|  | 1      | 8        | 0     | 8   |
|  | 1      | 10       | 3     | 13  |
|  | 1      | 9        | 0     | 9   |
|  | 3      | 7        | 0     | 7   |
|  | 1      | 10       | 4     | 14  |
|  | 1      | 7        | 0     | 7   |
|  | 4      | 7,5      | 0     | 7,5 |
|  | 4      | 10       | 0     | 10  |
|  | 4      | 10       | 0     | 10  |
|  | 3      | 9        | 0     | 9   |
|  | 4      | 8        | 0     | 8   |
|  | 3      | 12       | 2     | 14  |
|  | 4      | 10       | 0     | 10  |
|  | 3      | 8        | 0     | 8   |
|  | 4      | 6        | 0     | 6   |

Number of Years at Current Address

8  
14  
1  
2,58  
0,16  
0,33  
4  
7  
3  
4  
2,42  
0,375  
0,083  
0,083  
3,5  
5,42  
5,25  
10,92  
8,75  
7,58  
8,58  
5,5  
6,42  
2  
5,17  
5,33  
4  
11,58  
14,25  
5  
8  
7,25  
10  
2  
2,7  
10  
8  
2  
10  
2,5  
15  
3,5  
2,83  
22  
1,5



Please Rate Your Quality of Health (Very Poor=1; Poor=2; Average=3; Good=4; Excellent=5)

4  
4  
3  
3  
3  
4  
4  
3  
4  
3  
3  
3  
4  
4  
3  
4  
4  
5  
3  
4  
4  
4  
4  
3  
3  
3  
3  
4  
3  
4  
4  
3  
3  
4  
4  
4  
4  
4  
4  
3  
2  
4  
4  
4  
5  
3  
5  
4  
4

Health Better, Same or Worse Than Others (Better=1; Same=2; Worse=3)

Hypertension

|   |   |
|---|---|
| 1 | 1 |
| 1 | 1 |
| 2 | 1 |
| 1 | 0 |
| 1 | 1 |
| 1 | 1 |
| 2 | 1 |
| 1 | 0 |
| 1 | 0 |
| 1 | 1 |
| 1 | 0 |
| 1 | 1 |
| 1 | 1 |
| 1 | 1 |
| 2 | 1 |
| 1 | 1 |
| 1 | 1 |
| 1 | 1 |
| 2 | 1 |
| 1 | 1 |
| 1 | 1 |
| 1 | 0 |
| 1 | 1 |
| 2 | 1 |
| 1 | 0 |
| 1 | 1 |
| 1 | 1 |
| 1 | 0 |
| 1 | 1 |
| 2 | 0 |
| 1 | 1 |
| 1 | 0 |
| 1 | 0 |
| 1 | 1 |
| 3 | 1 |
| 2 | 1 |
| 1 | 1 |
| 1 | 0 |
| 1 | 1 |
| 1 | 0 |
| 1 | 1 |
| 1 | 1 |
| 1 | 1 |
| 1 | 1 |
| 2 | 1 |





| TOTAL HOUSE WORK E.E | TOTAL YARD WORK E.E | TOTAL CARE TAKING E.E | TOTAL EXERCISE E.E |
|----------------------|---------------------|-----------------------|--------------------|
| 717,5                | 0                   | 660                   | 0                  |
| 1034,5               | 0                   | 0                     | 240                |
| 1977,5               | 176,125             | 0                     | 630                |
| 2585                 | 0                   | 0                     | 0                  |
| 742,5                | 0                   | 0                     | 0                  |
| 3775                 | 75                  | 0                     | 630                |
| 457,5                | 0,75                | 0                     | 0                  |
| 965                  | 0                   | 27,5                  | 0                  |
| 752,5                | 1,125               | 0                     | 1620               |
| 2022,5               | 0                   | 480                   | 0                  |
| 1205                 | 100                 | 0                     | 135                |
| 1310                 | 150                 | 0                     | 0                  |
| 3342,5               | 2,25                | 2215                  | 240                |
| 3687,5               | 1140                | 0                     | 0                  |
| 1348,5               | 0                   | 0                     | 1800               |
| 1076                 | 0                   | 0                     | 0                  |
| 2174                 | 0                   | 0                     | 0                  |
| 2704,5               | 0                   | 27,5                  | 0                  |
| 1397,5               | 0                   | 0                     | 630                |
| 2364                 | 0                   | 0                     | 750                |
| 4321,5               | 0                   | 0                     | 210                |
| 2985                 | 0                   | 0                     | 0                  |
| 1488                 | 0                   | 0                     | 0                  |
| 920                  | 0                   | 0                     | 0                  |
| 1361,5               | 0                   | 0                     | 0                  |
| 2538,5               | 0                   | 0                     | 450                |
| 1280                 | 0                   | 0                     | 360                |
| 1212,5               | 270                 | 0                     | 0                  |
| 1732,5               | 957,5               | 0                     | 270                |
| 0                    | 0                   | 0                     | 720                |
| 205                  | 300                 | 0                     | 0                  |
| 1167,5               | 270                 | 0                     | 0                  |
| 1129                 | 10                  | 0                     | 840                |
| 1777,5               | 1080                | 0                     | 0                  |
| 9365                 | 4080                | 0                     | 240                |
| 3000                 | 300                 | 0                     | 0                  |
| 1094                 | 0                   | 720                   | 0                  |
| 2565,5               | 0                   | 295                   | 120                |
| 572,5                | 225                 | 0                     | 240                |
| 3109,5               | 615                 | 0                     | 375                |
| 3022,5               | 45                  | 0                     | 90                 |
| 2550                 | 350                 | 0                     | 0                  |
| 2755                 | 870                 | 0                     | 0                  |
| 1225                 | 180                 | 0                     | 0                  |
| 2755                 | 495                 | 0                     | 240                |

| TOTAL RECREATION E.E | TOTAL E.E | TOTAL P.A MINS |
|----------------------|-----------|----------------|
| 1470                 | 2847,5    | 785            |
| 35                   | 1309,5    | 441            |
| 312,5                | 3096,125  | 915            |
| 505                  | 3090      | 1010           |
| 245                  | 987,5     | 355            |
| 1027,5               | 5507,5    | 1510           |
| 210                  | 668,25    | 240            |
| 0                    | 992,5     | 335            |
| 0                    | 2373,625  | 630            |
| 960                  | 3462,5    | 1270           |
| 210                  | 1650      | 525            |
| 137,5                | 1597,5    | 441            |
| 825                  | 6624,75   | 1915           |
| 420                  | 5247,5    | 1235           |
| 735                  | 3883,5    | 935            |
| 645                  | 1721      | 536            |
| 210                  | 2384      | 834            |
| 630                  | 3362      | 1088           |
| 950                  | 2977,5    | 805            |
| 1920                 | 5034      | 1834           |
| 6300                 | 10831,5   | 5239           |
| 3670                 | 6655      | 3050           |
| 0                    | 1488      | 498            |
| 370                  | 1290      | 540            |
| 490                  | 1851,5    | 555            |
| 315                  | 3303,5    | 1036           |
| 82,5                 | 1722,5    | 465            |
| 2100                 | 3582,5    | 1480           |
| 900                  | 3860      | 1200           |
| 35                   | 755       | 130            |
| 1935                 | 2440      | 830            |
| 280                  | 1717,5    | 510            |
| 720                  | 2699      | 706            |
| 3780                 | 6637,5    | 2385           |
| 595                  | 14280     | 4265           |
| 1142,5               | 4442,5    | 1415           |
| 1640                 | 3454      | 1204           |
| 442,5                | 3423      | 1178           |
| 97,5                 | 1135      | 345            |
| 162,5                | 4262      | 1307           |
| 470                  | 3627,5    | 1220           |
| 210                  | 3110      | 1030           |
| 1085                 | 4710      | 1275           |
| 990                  | 2395      | 740            |
| 70                   | 3560      | 1220           |
