# Supplementary material for: Efficacy of interactive video gaming in older adults with memory complaints: A cluster-randomized exercise intervention
Source: PubMed Central journal article supplement (PMC8148311; doi:10.1371/journal.pone.0252016), 2021-05-25
Supplement: pone.0252016.s003.pdf [file pone.0252016.s003.pdf]

## THE DEMOGRAPHIC, HEALTH and WELLNESS QUESTIONNAIRE

| PERSONAL DETAILS |                |
|------------------|----------------|
| Name:            | Surname:       |
| Age:             | Date of Birth: |
| Code:            | Date:          |

---

### Section One: Socio-demographic and health information

|         |         |  |           |  |
|---------|---------|--|-----------|--|
| 1) Sex: | 1. Male |  | 2. Female |  |
|---------|---------|--|-----------|--|

|                                |  |       |  |
|--------------------------------|--|-------|--|
| 2) Are you currently employed? |  |       |  |
| 1. Yes                         |  | 2. No |  |
| If yes, what job do you do?    |  |       |  |
|                                |  |       |  |
|                                |  |       |  |

|                                         |  |
|-----------------------------------------|--|
| 3) What is your current marital status? |  |
| 1. Married                              |  |
| 2. Single                               |  |
| 3. Divorced                             |  |
| 4. Widowed                              |  |

|                                                  |  |
|--------------------------------------------------|--|
| 4) How many years of education did you complete? |  |
|--------------------------------------------------|--|

|                                                                          |
|--------------------------------------------------------------------------|
| 5) How long are you living at this current address / retirement village? |
|                                                                          |

|                                                      |  |
|------------------------------------------------------|--|
| 6) What is your highest level of education obtained? |  |
| 1. Primary School Education                          |  |
| 2. Secondary School Education                        |  |
| 3. Tertiary Education                                |  |

|                                                   |  |
|---------------------------------------------------|--|
| 7) How would you rate your current health status? |  |
| 1. Very poor                                      |  |
| 2. Poor                                           |  |
| 3. Average                                        |  |
| 4. Good                                           |  |
| 5. Excellent                                      |  |

|                                                                                              |  |
|----------------------------------------------------------------------------------------------|--|
| 8) Do you think your health is Better, the Same or Worse than/as others the same age as you? |  |
| 1. Better                                                                                    |  |
| 2. Same                                                                                      |  |
| 3. Worse                                                                                     |  |

|                                                                                          |  |                        |    |
|------------------------------------------------------------------------------------------|--|------------------------|----|
| 9) Has your doctor previously diagnosed you for any of the following medical conditions: |  | Are you on medication? |    |
|                                                                                          |  | Yes                    | No |
| 1. Hypertension                                                                          |  | Name:                  |    |
|                                                                                          |  | Dosage:                |    |
| 2. High cholesterol                                                                      |  | Name:                  |    |
|                                                                                          |  | Dosage:                |    |
| 3. Diabetes mellitus                                                                     |  | Name:                  |    |
|                                                                                          |  | Dosage:                |    |
| 4. Asthma                                                                                |  | Name:                  |    |
|                                                                                          |  | Dosage:                |    |
| 5. Peripheral vascular disease                                                           |  | Name:                  |    |
|                                                                                          |  | Dosage:                |    |
| 6. None                                                                                  |  |                        |    |

## Section Two: Weekly Physical Activity Habits

|                                           |              |              |
|-------------------------------------------|--------------|--------------|
| <b>Record of appointment<br/>and time</b> | <b>Date:</b> | <b>Time:</b> |
|-------------------------------------------|--------------|--------------|

*This questionnaire was developed for the use on older adults. We are using this questionnaire to calculate the amount for physical activity you participate in during a week and what is your total energy expenditure from the activities you participate in. The questions are based on 5 categories such as: **work, yard work, care taking, exercise and recreation.***

| ACTIVITY                                                                                            | TIME  |         |      | INTENSITY CODE |
|-----------------------------------------------------------------------------------------------------|-------|---------|------|----------------|
|                                                                                                     | hours | minutes | Days |                |
| <b>WORK</b>                                                                                         |       |         |      |                |
| Shopping (eg, clothes, groceries)                                                                   |       |         |      | 3.5            |
| Stair Climbing while carrying a load                                                                |       |         |      | 8.5            |
| Laundry:<br>unloading/loading machine, hanging, folding only,<br><br>washing clothes by hand        |       |         |      | 3.0            |
|                                                                                                     |       |         |      | 4.0            |
| Light housework:<br>tidying, dusting, sweeping, collecting rubbish in the home, polishing, ironing. |       |         |      | 3.0            |
| Heavy housework:<br>vacuuming, mopping, scrubbing floors and                                        |       |         |      | 4.5            |

|                                                                                |  |  |  |     |
|--------------------------------------------------------------------------------|--|--|--|-----|
| walls, moving furniture, boxes or rubbish bins                                 |  |  |  |     |
| Food preparation: chopping, stirring, moving about to get food items and pans. |  |  |  | 2.5 |
| Food services: setting table, carrying food, serving food                      |  |  |  | 2.5 |
| Dish washing: clearing the table, washing/drying dishes, putting dishes away.  |  |  |  | 2.5 |
| Light home repairs. Small appliance repairs light home maintenance / repair.   |  |  |  | 3.0 |
| Heavy home repairs: painting, carpentry, washing/polishing car.                |  |  |  | 5.5 |
| Other:                                                                         |  |  |  |     |

| ACTIVITY                                                  | TIME  |         |      | INTENSITY CODE |
|-----------------------------------------------------------|-------|---------|------|----------------|
|                                                           | hours | minutes | days |                |
| <b>YARD WORK</b>                                          |       |         |      |                |
| Gardening, pruning, planting, weeding, digging, hoeing    |       |         |      | 4.5            |
| Lawn mowing (walking only)                                |       |         |      | 4.5            |
| Clearing walks / driveways : sweeping, shovelling, raking |       |         |      | 5.0            |
| Other:                                                    |       |         |      |                |

| ACTIVITY                                               | TIME  |         |      | INTENSITY CODE |
|--------------------------------------------------------|-------|---------|------|----------------|
|                                                        | hours | minutes | days |                |
| <b>CARE TAKING</b>                                     |       |         |      |                |
| Older or disabled person (lifting, pushing wheelchair) |       |         |      | 5.5            |
| Child care (lifting, carrying, pushing pram)           |       |         |      | 4.0            |

| ACTIVITY                         | TIME  |         |      | INTENSITY CODE |
|----------------------------------|-------|---------|------|----------------|
|                                  | hours | minutes | days |                |
| <b>EXERCISE</b>                  |       |         |      |                |
| Brisk walking                    |       |         |      | 6.0            |
| Pool exercises, stretching, yoga |       |         |      | 3.0            |
| Vigorous calisthenics, aerobics  |       |         |      | 6.0            |
| Cycling                          |       |         |      | 6.0            |
| Swimming (laps only)             |       |         |      | 6.0            |
| Other                            |       |         |      |                |

| ACTIVITY                                       | TIME  |         |      | INTENSITY CODE |
|------------------------------------------------|-------|---------|------|----------------|
|                                                | hours | minutes | days |                |
| <b>RECREATION</b>                              |       |         |      |                |
| Leisurely / slow walking                       |       |         |      | 3.5            |
| Needlework: knitting, sewing, needlepoint etc. |       |         |      | 1.5            |
| Dancing: line, ballroom, tap, square etc.      |       |         |      | 5.5            |
| Bowling                                        |       |         |      | 3.0            |
| Golf                                           |       |         |      | 5.0            |
| Racquet sports: tennis, squash                 |       |         |      | 7.0            |
| Billiards                                      |       |         |      | 2.5            |
| Other                                          |       |         |      |                |
